# Supplementary material for: Loss of PRC1 induces higher-order opening of Hox loci independently of transcription during Drosophila embryogenesis
Source: PubMed Central journal article supplement (PMC6156336; doi:10.1038/s41467-018-05945-4), 2018-09-25
Supplement: 41467_2018_5945_MOESM1_ESM.pdf [file 41467_2018_5945_MOESM1_ESM.pdf]

## **Supplementary Information**

**Loss of PRC1 induces higher-order opening of Hox loci independently of transcription during *Drosophila* embryogenesis**

Thierry Cheutin and Giacomo Cavalli

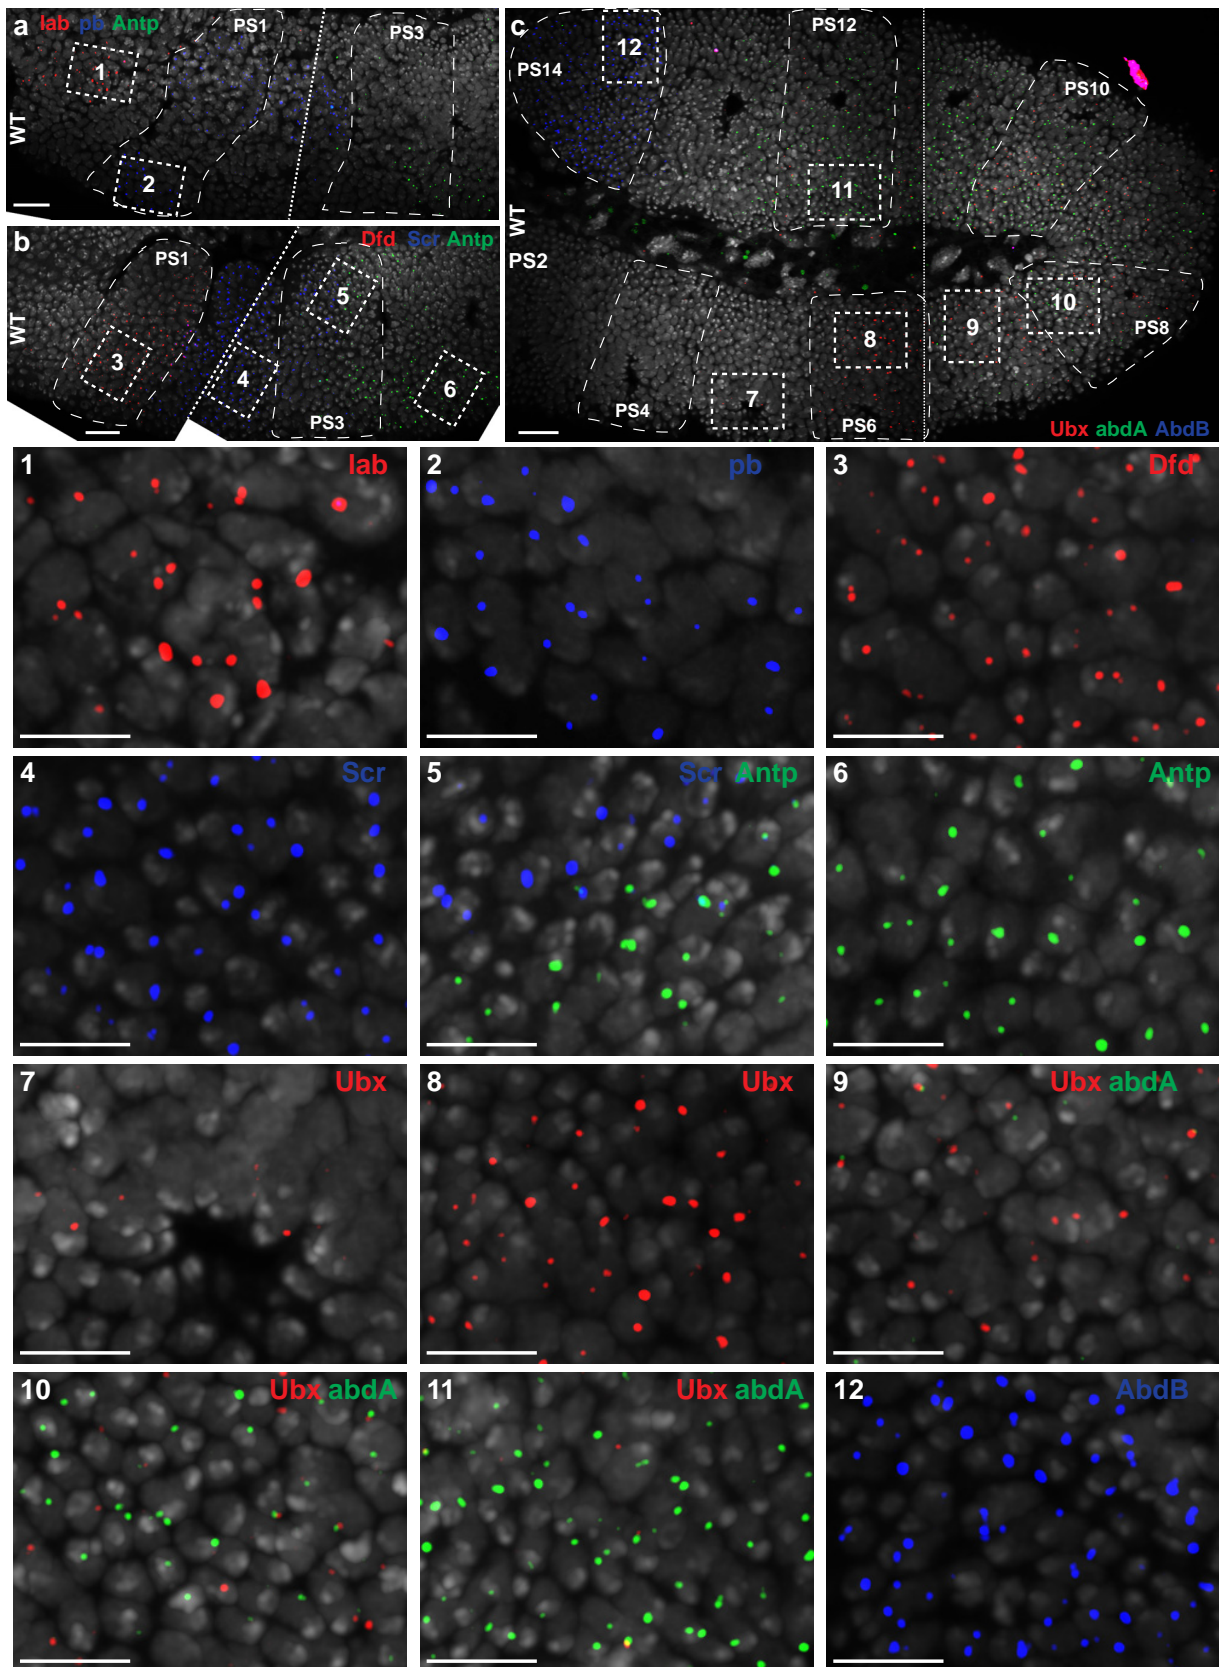

**Supplementary Figure 1: Hox genes expression in WT embryos.** a-c: RNA FISH pictures of wild-type (WT) *Drosophila* embryos 3:50-7:20 after fertilization illustrating the pattern of Hox gene transcription. These images are maximum intensity projections of confocal images and dash lines indicate where two images were merged. Scale bars, 20  $\mu\text{m}$ . PS, parasegment. 1-12: insets focusing a few cells showing nuclear RNA-FISH spots along the anteroposterior axis. Scale bars, 10  $\mu\text{m}$ .

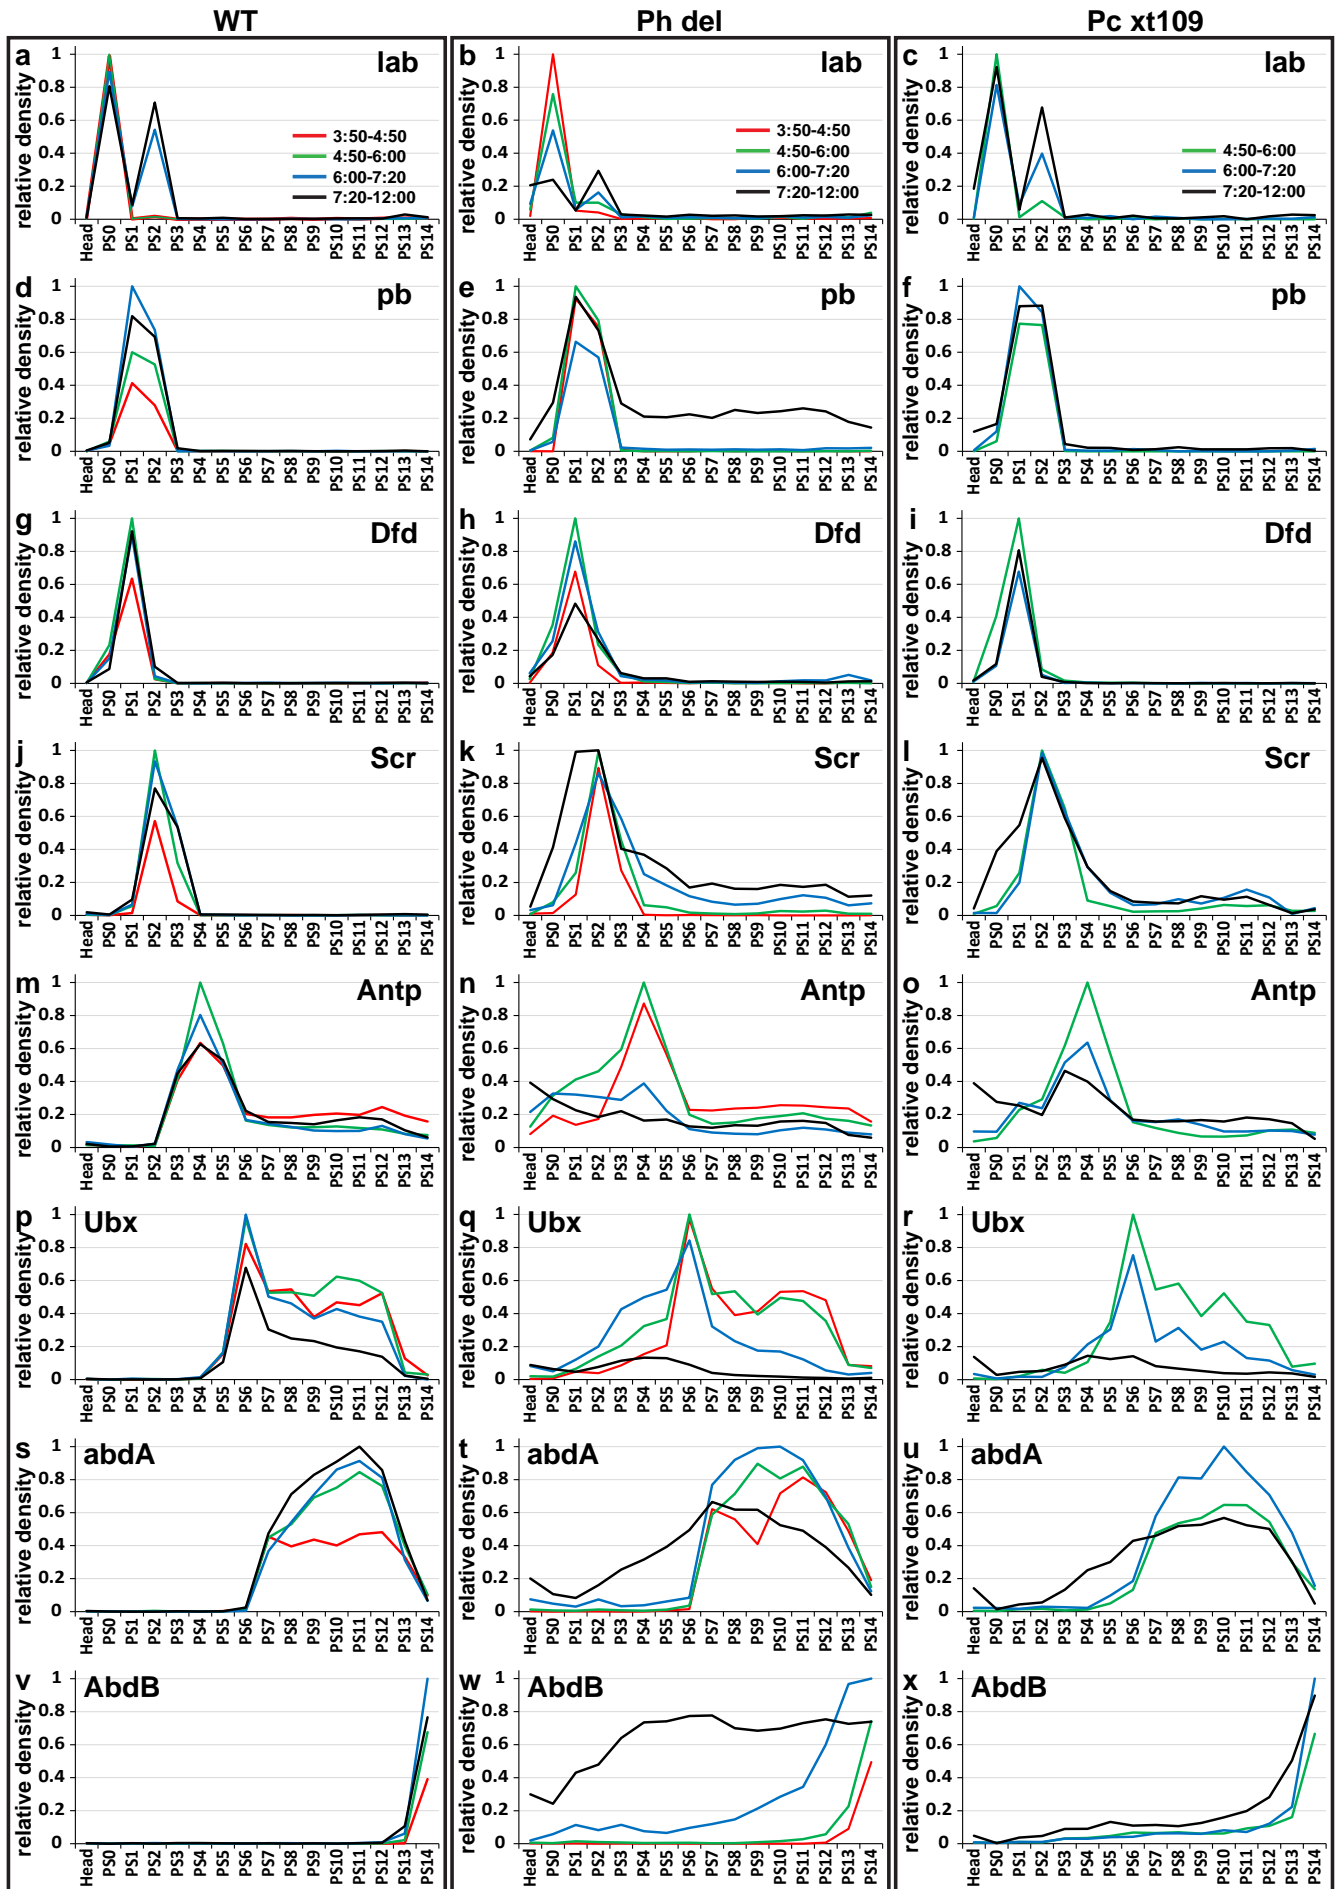

Supplementary Figure 2: Hox genes expression in WT, Phdel and PcXT109 embryos. Relative density

of RNA FISH spots measured for each Hox gene (*lab*: a-c; *pb*: d-f; *Dfd*: g-i; *Scr*: j-l; *Antp*: m-o; *Ubx*: p-r; *abdA*: s-u; *AbdB*: v-x) along the anteroposterior axis of WT (a, d, g, j, m, p, s, v), *ph<sup>del</sup>* (b, e, h, k, n, q, t, w) and *Pc<sup>XT109</sup>* (c, f, i, l, o, r, u, x) embryos. Time course quantification shows that Hox gene expression changes during embryogenesis (3:50-4:50: red; 4:50-6:00: green; 6:00-7:20: blue and 7:20-12:00: black) in both *ph<sup>del</sup>* and *Pc<sup>XT109</sup>* embryos. The first ectopic Hox gene expression observed in *ph<sup>del</sup>* embryos occurs as soon as 3:50-4:50, whereas it appears only at 4:50-6:00 in *Pc<sup>XT109</sup>* embryos. The proportion of cells showing ectopic Hox gene expression increases globally during the later embryogenesis of both *ph<sup>del</sup>* and *Pc<sup>XT109</sup>* embryos. Ph deletion generally has a stronger effect on Hox gene deregulation than Pc deletion, except for ectopic expression of *AbdB* in PS3-12 and *abdA* in PS5-6 at 4:50-6:00. Although early effects of Ph and Pc always showed Hox gene derepression, we observed *Ubx*, *abdA* and *Antp* silencing during late embryogenesis in both mutants. This late Hox genes silencing most likely reflects an indirect effect because posterior Hox genes can silenced the anterior ones, a phenomenon defined as “posterior dominance”.

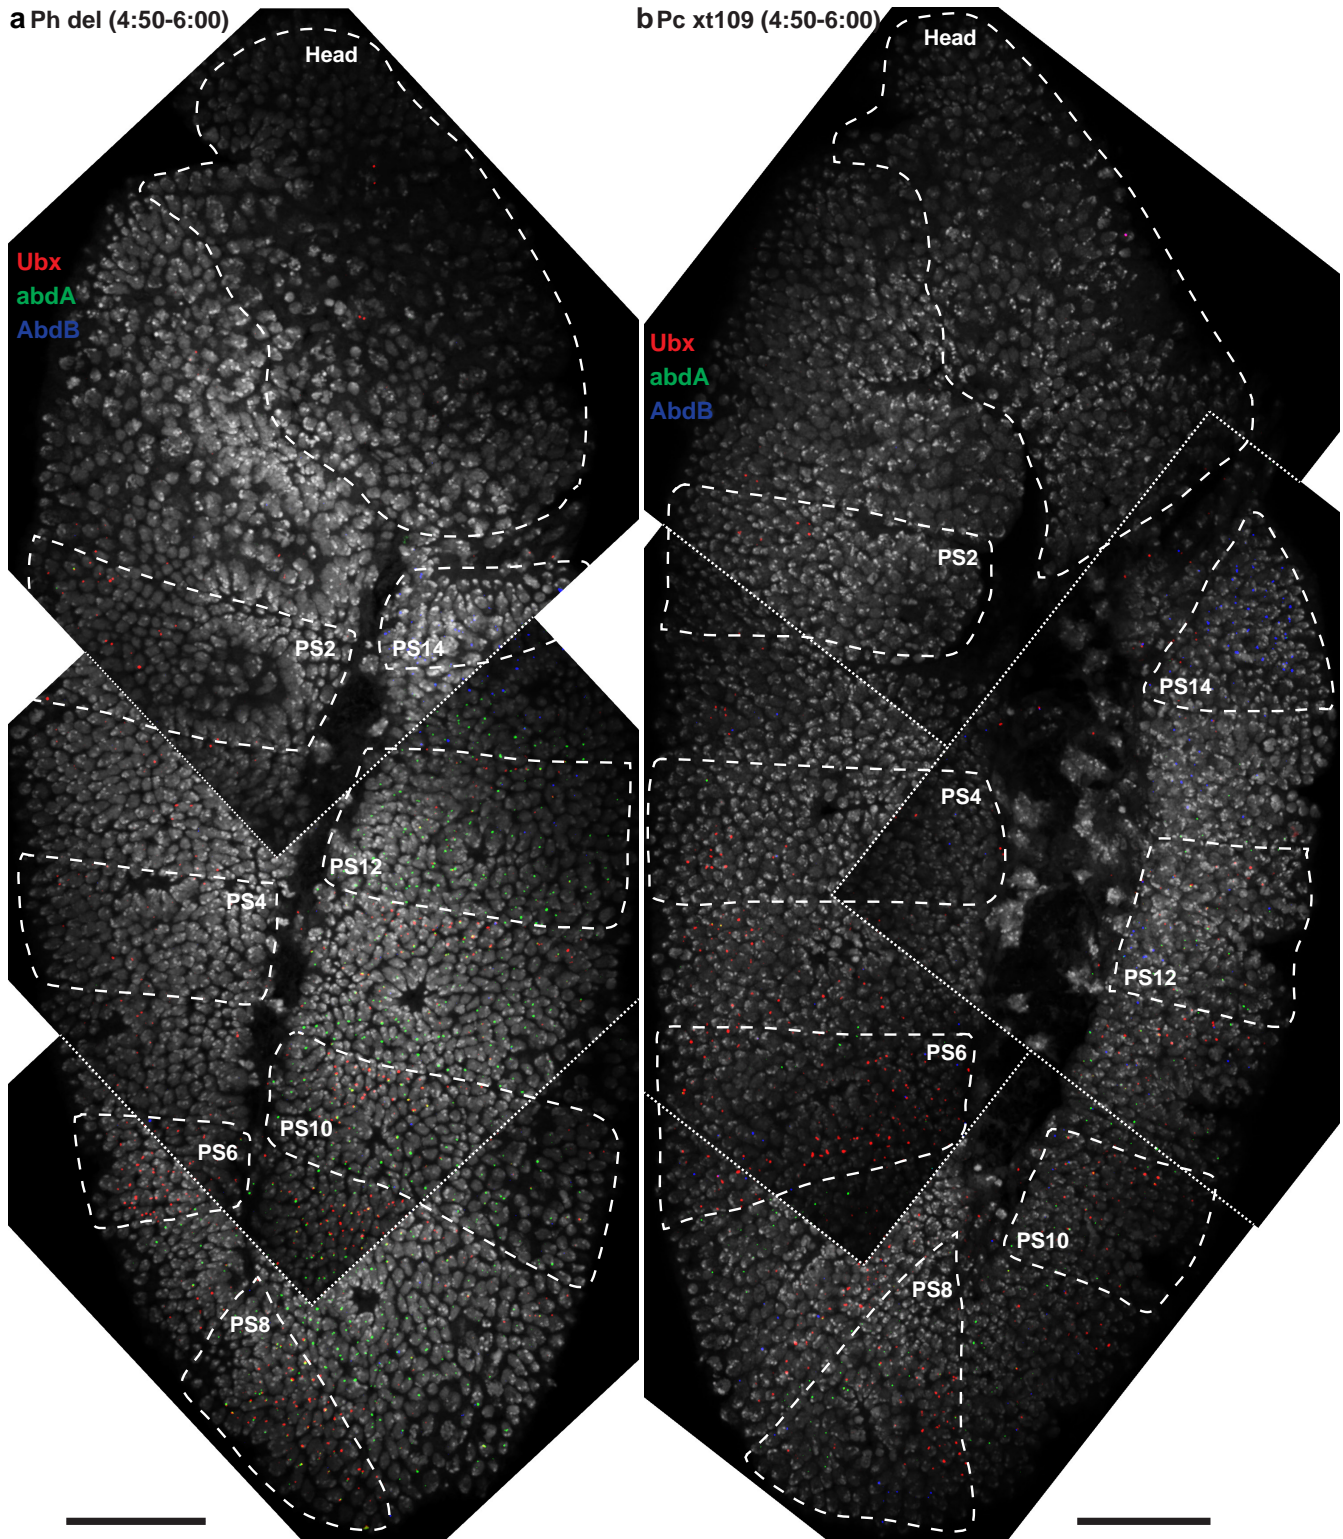

**Supplementary Figure 3: Hox genes of BX-C derepression in *Ph<sup>del</sup>* and *Pc<sup>XT109</sup>* embryos 4:50-6:00 after fertilization.** Images of RNA FISH experiments illustrating ectopic expression of *Ubx*, *abdA*, and *AbdB* occurring in *ph<sup>del</sup>* (a) and *Pc<sup>XT109</sup>* (b) embryos. These images are maximum intensity projections of confocal images and dash lines indicate where two images were merged. They illustrate the quantification of Hox gene derepression shown in Figure 2 and supplementary Figure 2. Scale bars, 50  $\mu$ m.

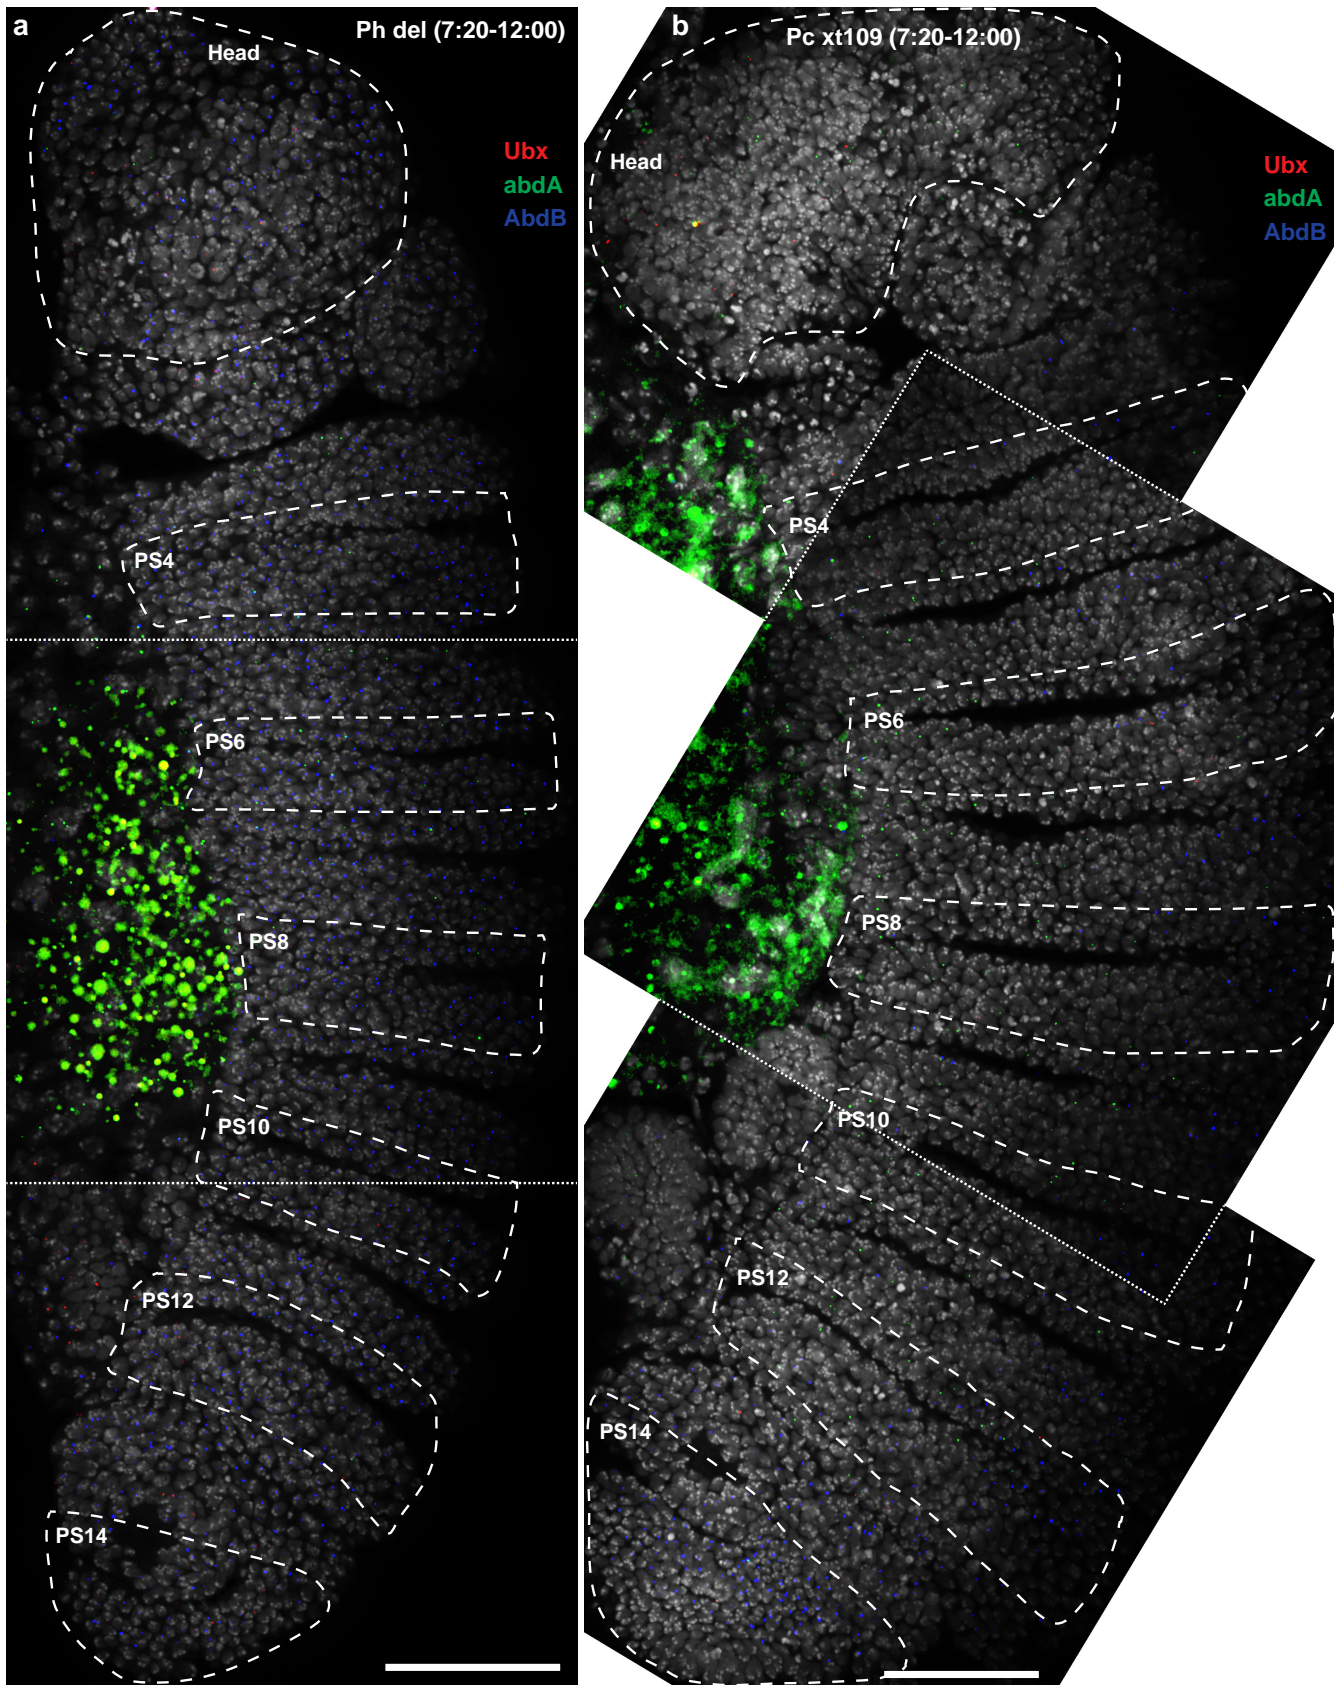

**Supplementary Figure 4: Hox genes of BX-C derepression in  $Ph^{del}$  and  $Pc^{XT109}$  embryos 7:20-12:00 after fertilization.** Images of RNA FISH experiments illustrating ectopic expression of *Ubx*, *abdA*, and *AbdB* occurring in  $ph^{del}$  (a) and  $Pc^{XT109}$  (b) embryos. These images are maximum intensity projections of confocal images and dash lines indicate where two images were merged. They illustrate the quantification of Hox gene derepression shown in Figure 2 and supplementary Figure 2. Scale bars, 50  $\mu$ m.

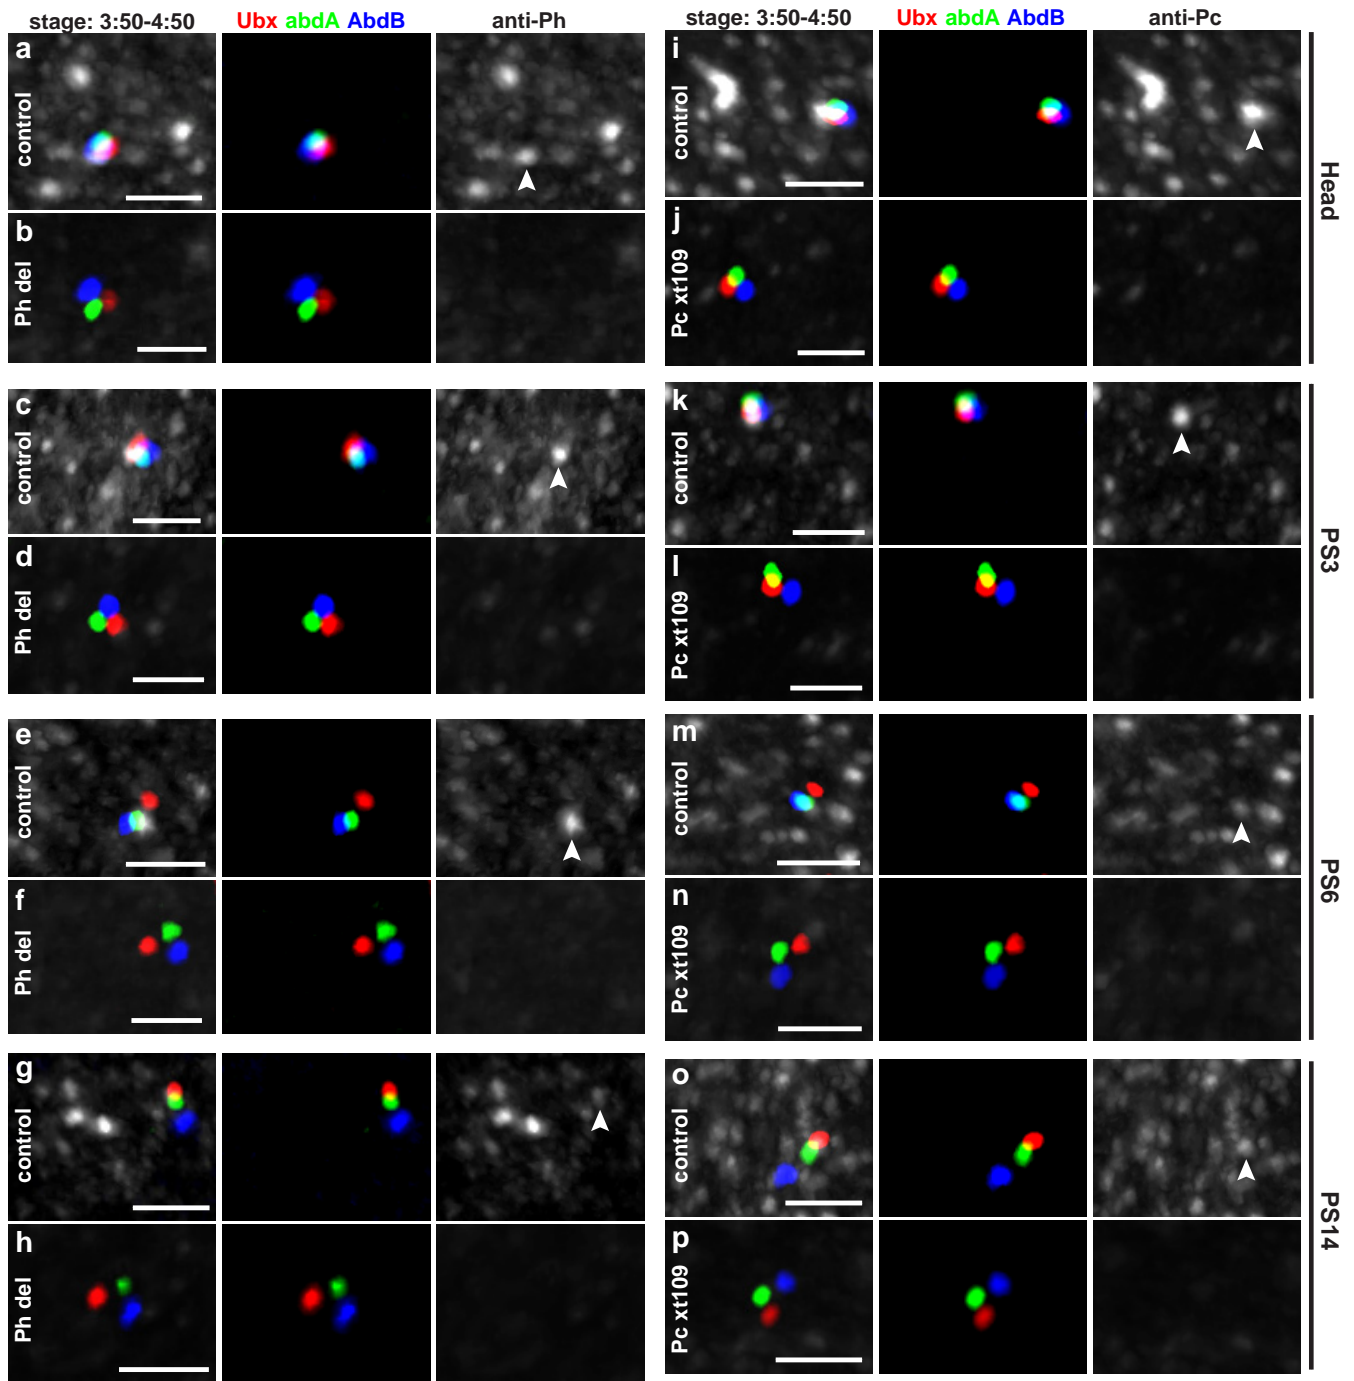

**Supplementary Figure 5: Effect of Ph and Pc on BX-C folding in embryos 3:50-4:50 after fertilization.** Images of immuno-DNA FISH experiments illustrating BX-C folding in embryos 3:50-4:50 after fertilization. An antibody anti-Ph was used to discriminate  $\text{Ph}^{\text{del}}$  mutant embryos (b, d, f, h) from control ones (a, c, e, g). An antibody anti-Pc was used to discriminate  $\text{Pc}^{\text{XT109}}$  mutant embryos (j, l, n, p) from control ones (i, k, m, o). In head and PS3, *Ubx*, *abdA* and *AbdB* are repressed and found inside a Ph/Pc foci (arrowhead) in control embryos (a, c, i, k), whereas BX-C folding is less compact in  $\text{Ph}^{\text{del}}$  (b, d) and  $\text{Pc}^{\text{XT109}}$  (j, l) embryos. *Ubx* is expressed in PS6 and located outside Ph/Pc foci in contrast to *abdA* and *AbdB* (arrowhead in e, m). The distance *abdA-AbdB* increases in  $\text{Ph}^{\text{del}}$  (f) and  $\text{Pc}^{\text{XT109}}$  (n) embryos. *AbdB* is expressed in PS14 and located outside Ph/Pc foci in contrast to *Ubx* and *abdA* (arrowhead in g, o). The distance *Ubx-abdA* increases in  $\text{Ph}^{\text{del}}$  (h) and  $\text{Pc}^{\text{XT109}}$  (p) embryos. Scale bars, 2  $\mu\text{m}$ .

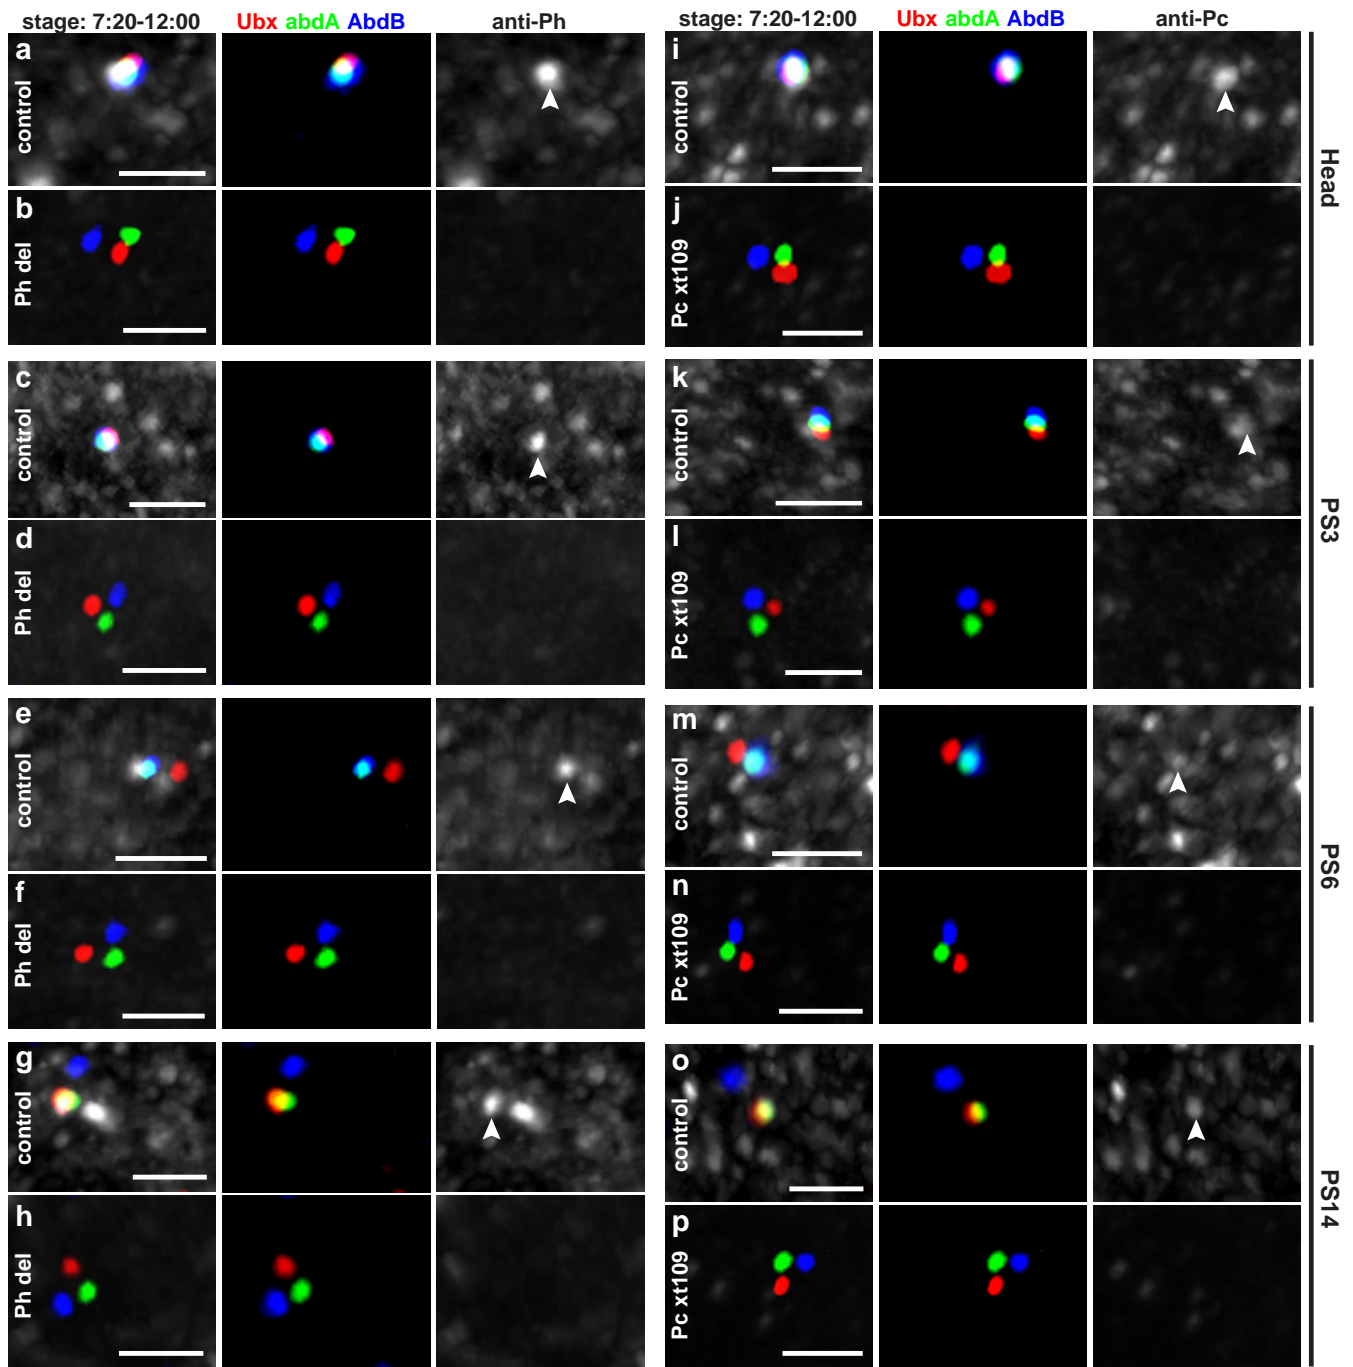

**Supplementary Figure 6: Effect of Ph and Pc on BX-C folding in embryos 7:20-12:00 after fertilization.** Images of immuno-DNA FISH experiments illustrating BX-C folding in embryos 7:20-12:00 after fertilization. An antibody anti-Ph was used to discriminate  $\text{Ph}^{\text{del}}$  mutant embryos (b, d, f, h) from control ones (a, c, e, g). An antibody anti-Pc was used to discriminate  $\text{Pc}^{\text{XT109}}$  mutant embryos (j, l, n, p) from control ones (i, k, m, o). In head and PS3, *Ubx*, *abdA* and *AbdB* are repressed and found inside a Ph/Pc foci (arrowhead) in control embryos (a, c, i, k), whereas BX-C folding is less compact in  $\text{Ph}^{\text{del}}$  (b, d) and  $\text{Pc}^{\text{XT109}}$  (j, l) embryos. *Ubx* is expressed in PS6 and located outside Ph/Pc foci in contrast to *abdA* and *AbdB* (arrowhead in e, m). The distance *abdA-AbdB* increases in  $\text{Ph}^{\text{del}}$  (f) and  $\text{Pc}^{\text{XT109}}$  (n) embryos. *AbdB* is expressed in PS14 and located outside Ph/Pc foci in contrast to *Ubx* and *abdA* (arrowhead in g, o). The distance *Ubx-abdA* increases in  $\text{Ph}^{\text{del}}$  (h) and  $\text{Pc}^{\text{XT109}}$  (p) embryos. Scale bars, 2  $\mu\text{m}$ .



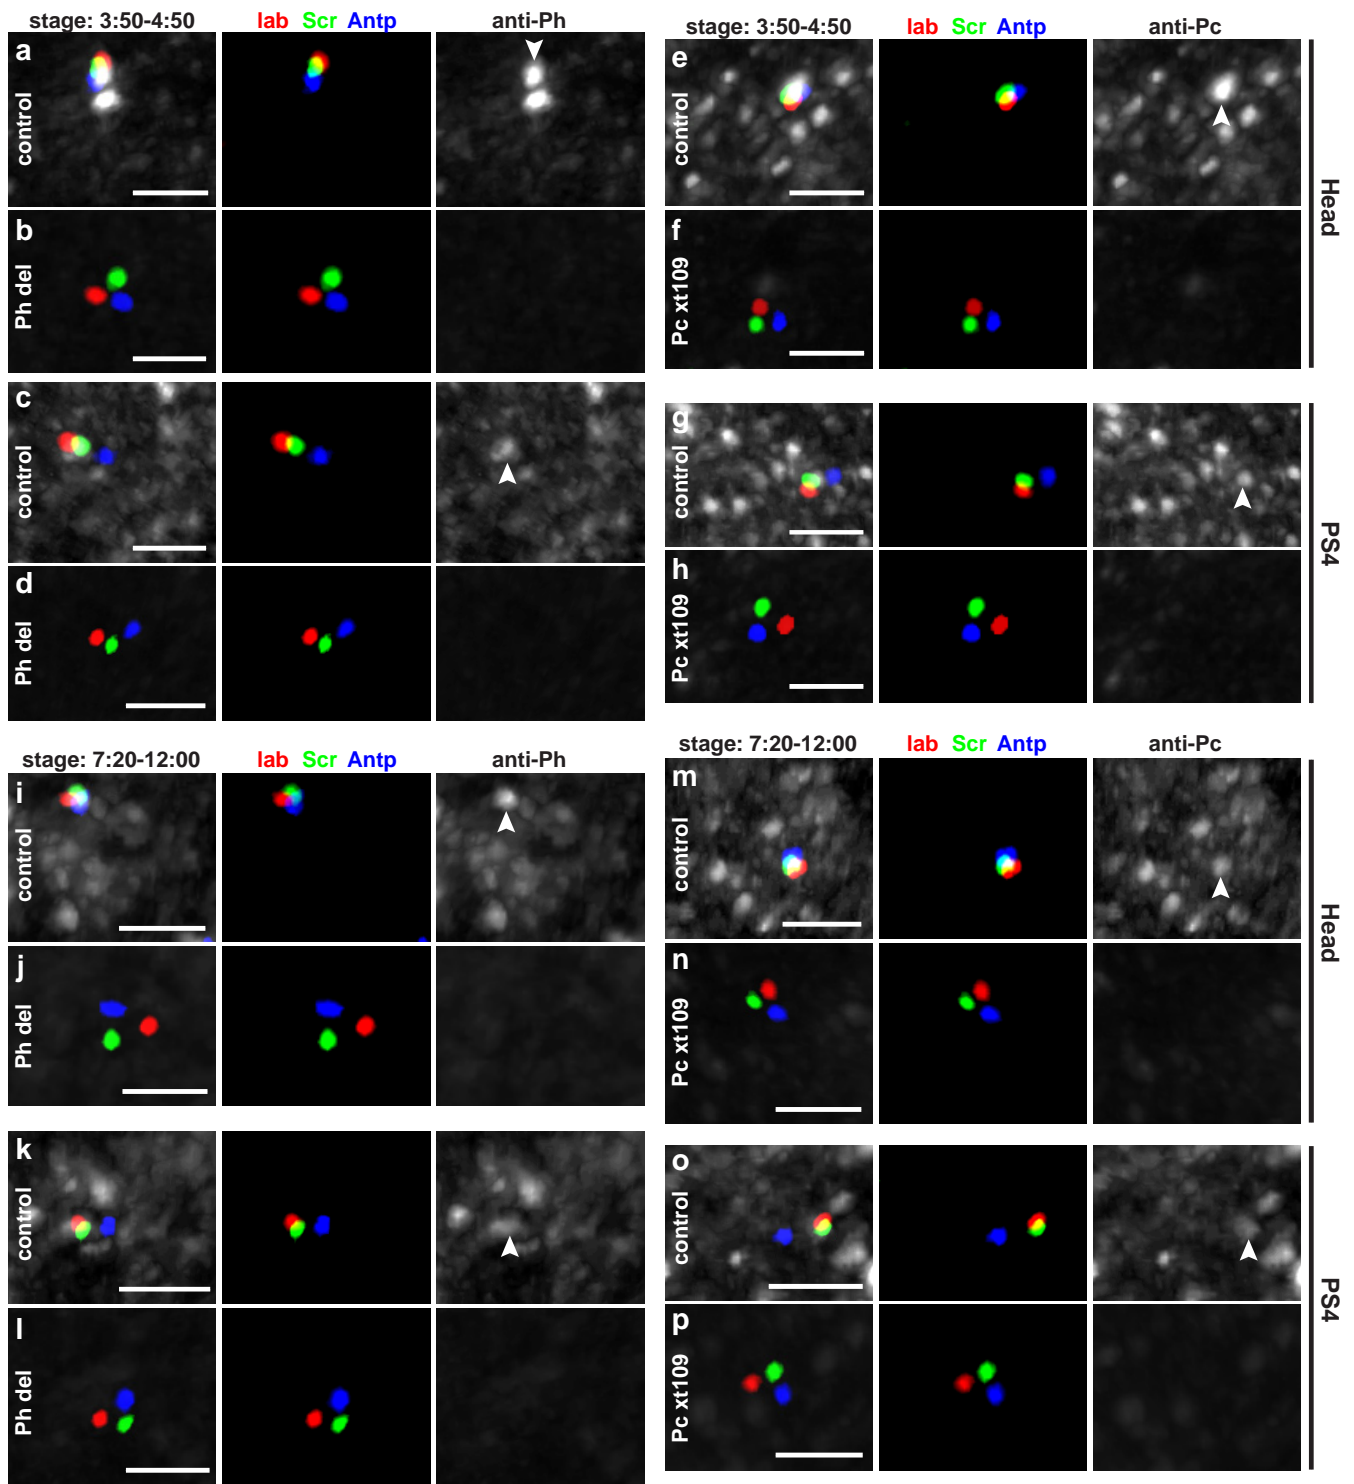

**Supplementary Figure 7: Effect of Ph and Pc on ANT-C folding.** Images of immuno-DNA FISH experiments illustrating ANT-C folding in embryos 3:50-4:50 (a-h) or 7:20-12:00 (i-p) after fertilization. An antibody anti-Ph was used to discriminate  $\text{Ph}^{\text{del}}$  mutant embryos (b, d, j, l) from control ones (a, c, i, k). An antibody anti-Pc was used to discriminate  $\text{Pc}^{\text{XT109}}$  mutant embryos (f, h, n, p) from control ones (e, g, m, o). In head, *lab*, *Scr* and *Antp* are repressed and found inside a Ph/Pc foci (arrowhead) in control embryos (a, e, i, m), whereas ANT-C folding is less compact in  $\text{Ph}^{\text{del}}$  (b, j) and  $\text{Pc}^{\text{XT109}}$  (f, n) embryos. *Antp* is expressed in PS4 and located outside Ph/Pc foci in contrast to *lab* and *Scr* (arrowhead in c, g, k, o). The distance *lab-Scr* increases in  $\text{Ph}^{\text{del}}$  (d, l) and  $\text{Pc}^{\text{XT109}}$  (h, p) embryos. Scale bars, 2  $\mu\text{m}$ .

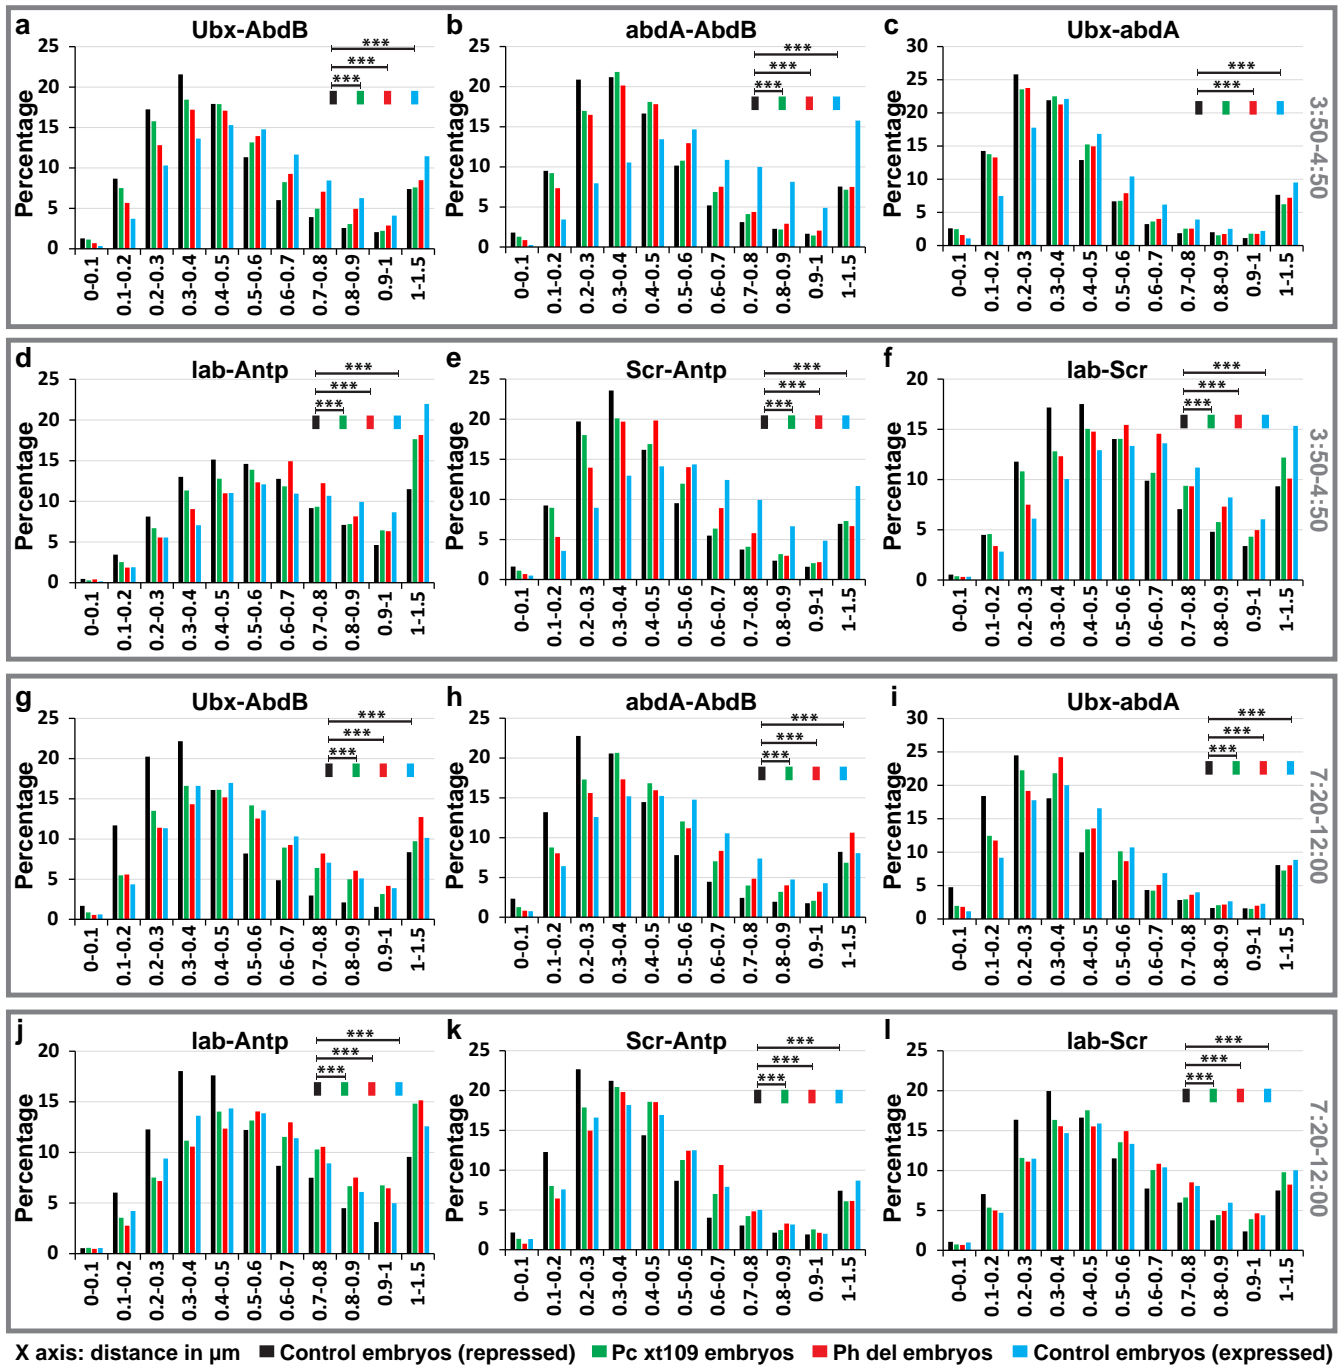

**Supplementary Figure 8: Comparison between the effects of Ph, Pc and Hox gene transcription on BX-C and ANT-C folding.** Histograms showing the distance distributions of *Ubx-AbdB* (a, g), *abdA-AbdB* (b, h), *Ubx-abdA* (c, i), *lab-Antp* (d, j), *Scr-Antp* (e, k), and *lab-Scr* (f-l) measured in the cell nuclei of embryos at the 3:50-4:50 (a-f) and 7:20-12:00 (g-l) stages after fertilization. To characterize the effects of Ph and Pc on the folding of completely repressed BX-C (corresponding to Fig. 3) and ANT-C (corresponding to Fig. 4), histograms show distances (in  $\mu\text{m}$ ) measured within the head and PS0 (a-c; g-i) or the head (d-f; j-l) of *ph<sup>del</sup>* (red), *Pc<sup>XT109</sup>* (green) and control embryos (merge of *ph<sup>del</sup>* and *Pc<sup>XT109</sup>* control embryos in black). To compare the effects of Ph and Pc on BX-C and ANT-C folding with the transcription of Hox genes, histograms also present distances measured in the parasegment of control embryos wherein Hox genes are expressed (blue: PS6-8 for distances *Ubx-abdA* and *Ubx-AbdB* and PS14 for distance *abdA-AbdB*; PS4-PS5 for distances *lab-Antp* and *Scr-Antp* and PS1-PS2 for distance *lab-Scr*). Significant differences are indicated (Mann-Whitney, U test, two-tailed, \*  $P < 0.05$ ; \*\*  $P < 0.01$ ; \*\*\*  $P < 0.001$ ).

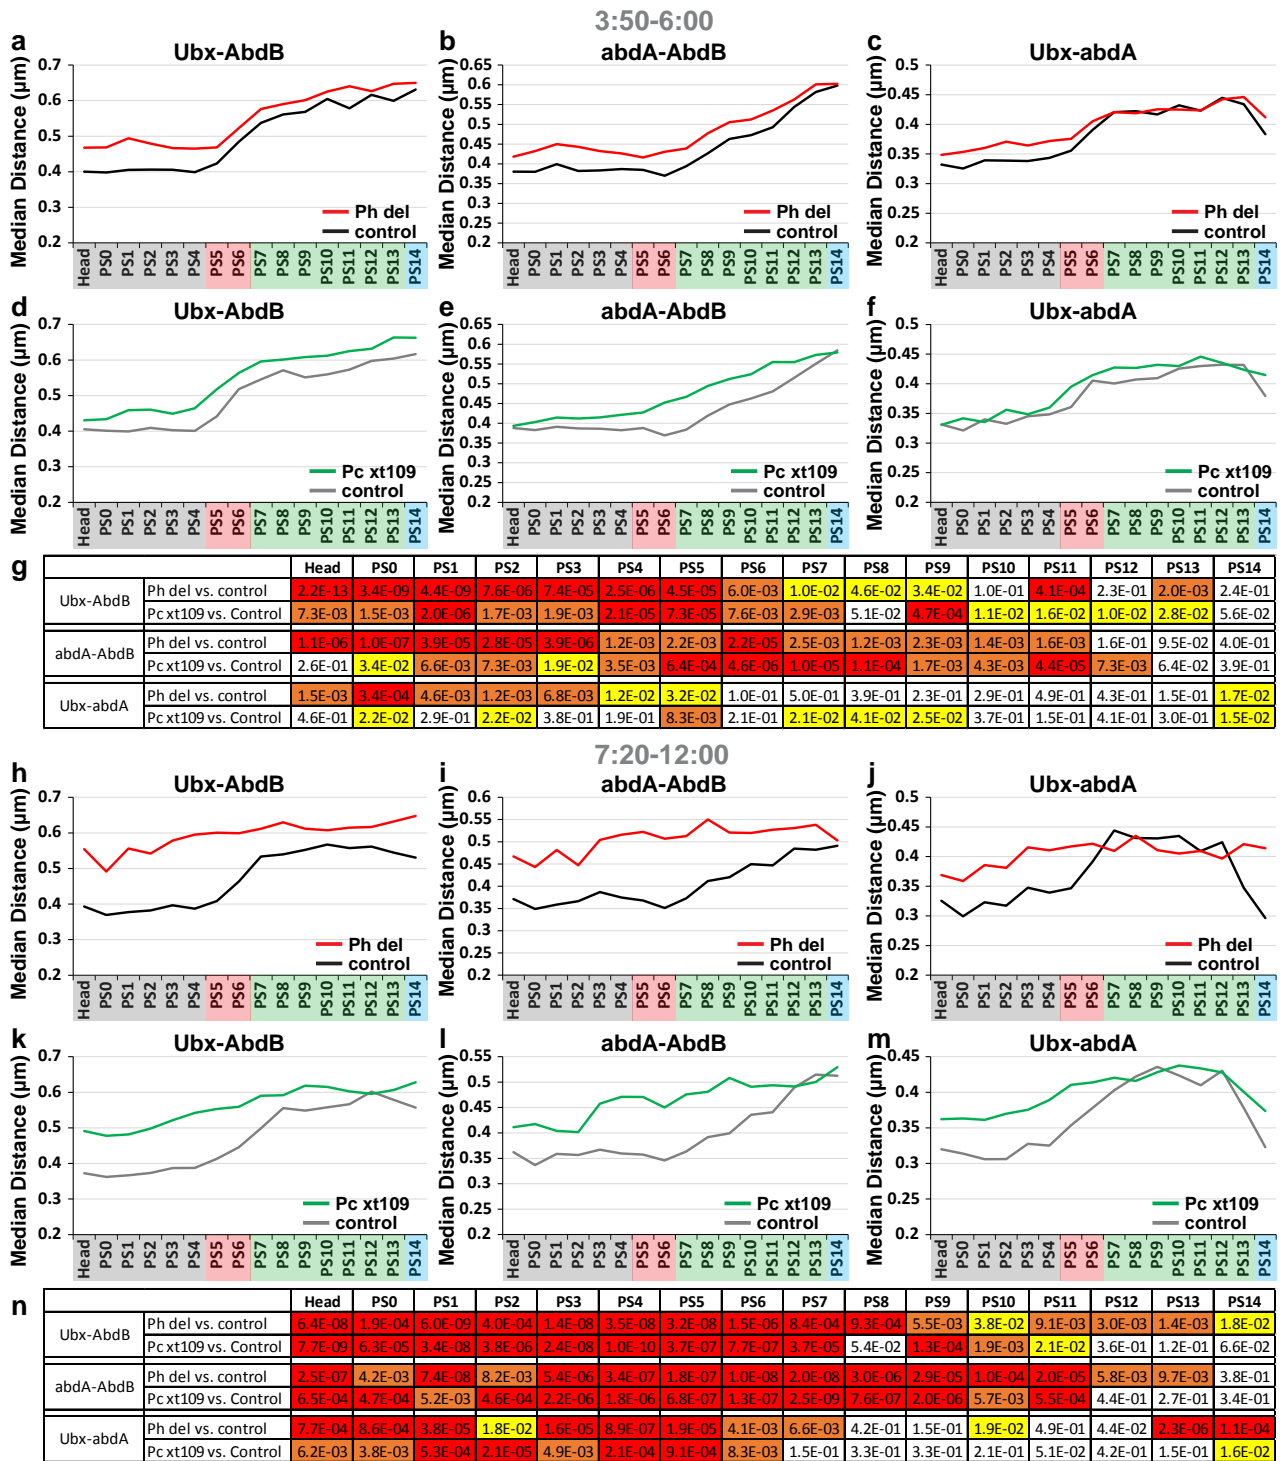

**Supplementary Figure 9: Effects of Ph and Pc on BX-C folding in early and late embryos.** The distances *Ubx-AbdB* (a, d, h, k), *abdA-AbdB* (b, e, i, l), and *Ubx-abdA* (c, f, j, m) were measured in the cell nuclei of *ph<sup>del</sup>* (red in a-c; h-j) embryos and their respective controls (black in a-c; h-j) or *Pc<sup>XT109</sup>* (green in d-f; k-m) embryos and their respective controls (grey in d-f; k-m) at 3:50-6:00 (a-f) and 7:20-12:00 (h-m) after fertilization. The highlighted PSs show regions wherein none of *Ubx*, *abdA* and *AbdB* (grey), only *Ubx* (red), both *Ubx* and *abdA* (green) or only *AbdB* (blue) are expressed. For each PS of each embryo, we computed the median distances *Ubx-abdA*, *abdA-AbdB* and *Ubx-AbdB*. Curves show the mean of median distances from several embryos calculated for each PS along the anteroposterior axis. g and n: Tables of p values comparing the distances *Ubx-AbdB*, *abdA-AbdB* and *Ubx-abdA* measured in *ph<sup>del</sup>* embryos with the those measured in their respective control embryos and in *Pc<sup>XT109</sup>* embryos with the those measured in their respective controls along the anteroposterior axis at the 3:50-6:00 (g) and 7:20-12:00 (n) stages after fertilization (t-test, one-tailed, yellow:  $P < 0.05$ ; orange:  $P < 0.01$ ; red:  $P < 0.001$ ).

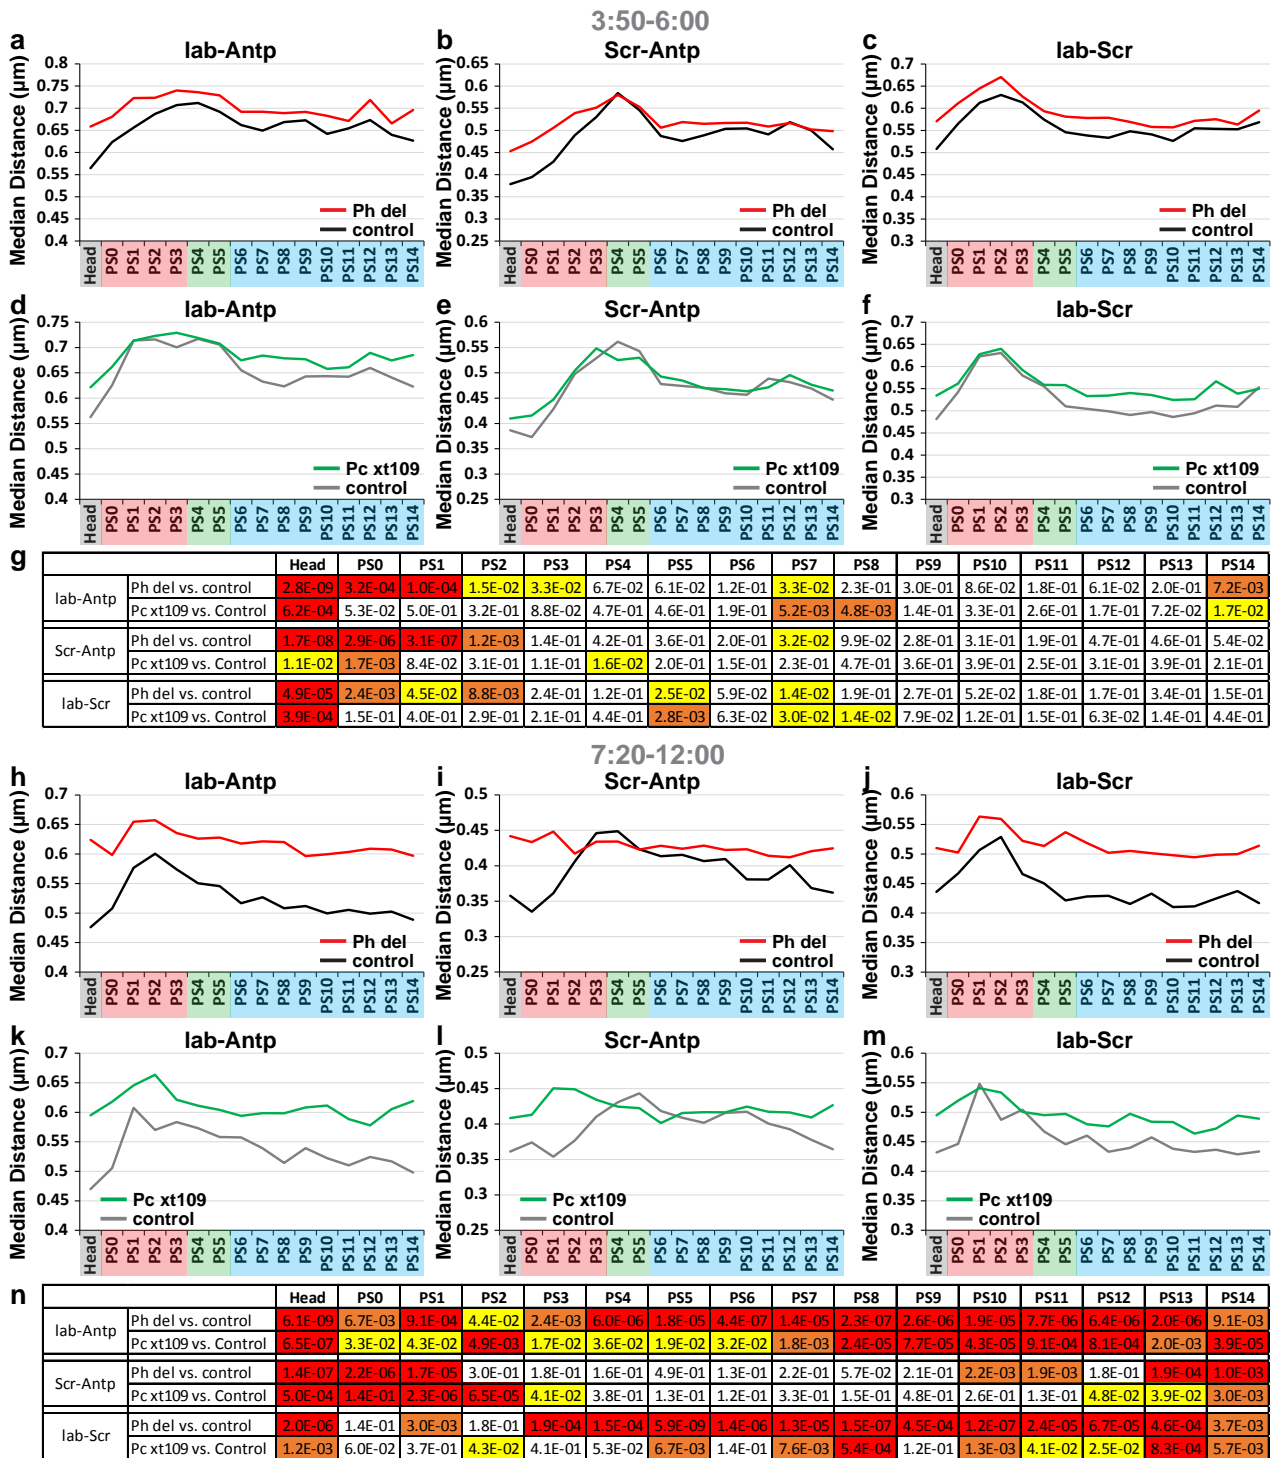

**Supplementary Figure 10: Effects of Ph and Pc on ANT-C folding in early and late embryos.** The distances *lab-Antp* (a, d, h, k), *Scr-Antp* (b, e, i, l), and *lab-Scr* (c, f, j, m) were measured in the cell nuclei of *ph<sup>del</sup>* (red in a-c; h-j) embryos and their respective controls (black in a-c; h-j) and in *Pc<sup>XT109</sup>* (green in d-f; k-m) embryos and their respective controls (grey in d-f; k-m) at the 3:50-6:00 (a-f) and 7:20-12:00 (h-m) stages after fertilization. The highlighted PSs show regions wherein *lab*, *Scr* and *Antp* are repressed (grey), Hox genes located between *lab* and *Scr* are expressed (red), and where *Antp* is fully (green) or mildly (blue) expressed. For each PS of each embryo, we computed the median distances *lab-Scr*, *Scr-Antp* and *lab-Antp*. Curves show the mean median distances from several embryos calculated for each PS along the anteroposterior axis. g and n: Tables of p values comparing the distances *lab-Antp*, *Scr-Antp* and *lab-Scr* measured in *ph<sup>del</sup>* embryos with the those measured in their respective controls and in *Pc<sup>XT109</sup>* embryos with the those measured in their respective controls along the anteroposterior axis at the 3:50-6:00 (g) and 7:20-12:00 (n) stages after fertilization (t-test, one-tailed, yellow:  $P < 0.05$ ; orange:  $P < 0.01$ ; red:  $P < 0.001$ ).

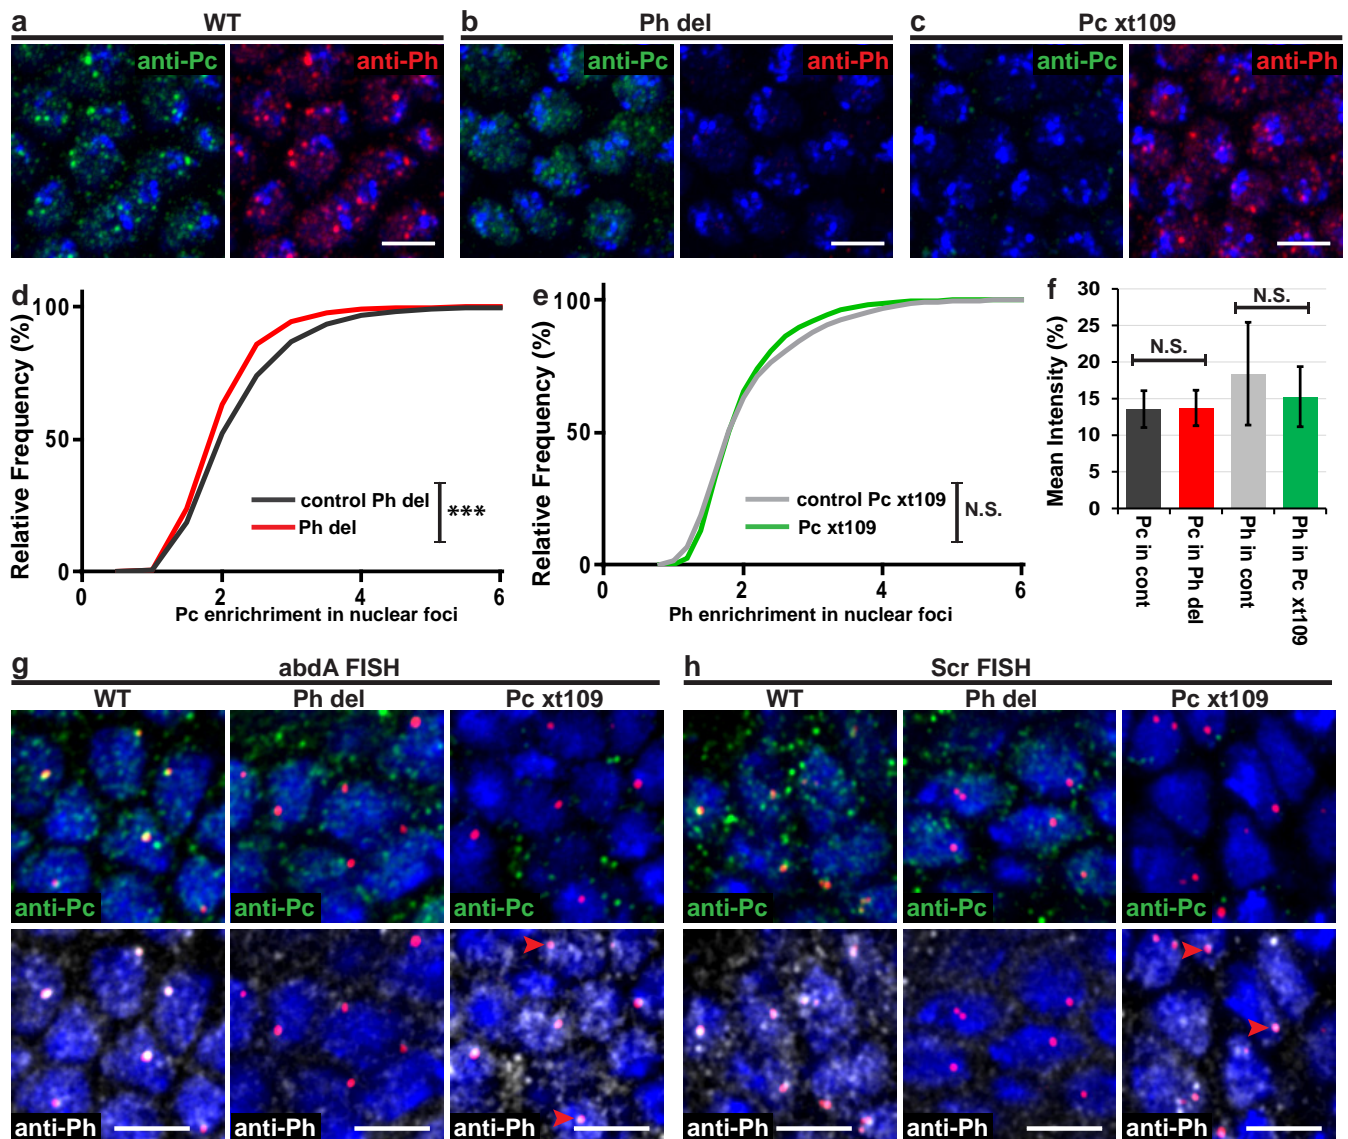

**Supplementary Figure 11: Formation of Ph foci in the absence of Pc within embryos 3:50-7:20 after fertilization.** a-c, Images of immunolabelling experiments performed in WT (a),  $ph^{del}$  (b) and  $Pc^{XT109}$  (c) embryos showing the distribution of Pc (green) and Ph (red) inside cell nuclei. d, e, cumulative histograms comparing the enrichment of Pc in nuclear foci between  $Ph^{del}$  and their controls embryos (d), or the enrichment of Ph in nuclear foci between  $Pc^{XT109}$  and their control embryos (e) (Mann-Whitney, U test, two-tailed, \*\*\*  $P < 0.001$ ). f, chart comparing the mean nuclear intensity with errors bars (SD;  $N \geq 7$ ) of Pc in  $Ph^{del}$  and their control embryos, and Ph in  $Pc^{XT109}$  and their control embryos (t-test, one-tailed). g, h, Pictures of immuno-DNA FISH experiments using anti-Pc (green), anti-Ph (grey) and DNA probes (red) recognizing the promoters of *abda* (g) or *Scr* (h) performed in WT,  $ph^{del}$  and  $Pc^{XT109}$  embryos. Scale bars, 5  $\mu$ m. Ph can form nuclear foci containing *abda* or *Scr* (red arrows) in the absence of Pc, whereas the reverse is not true.

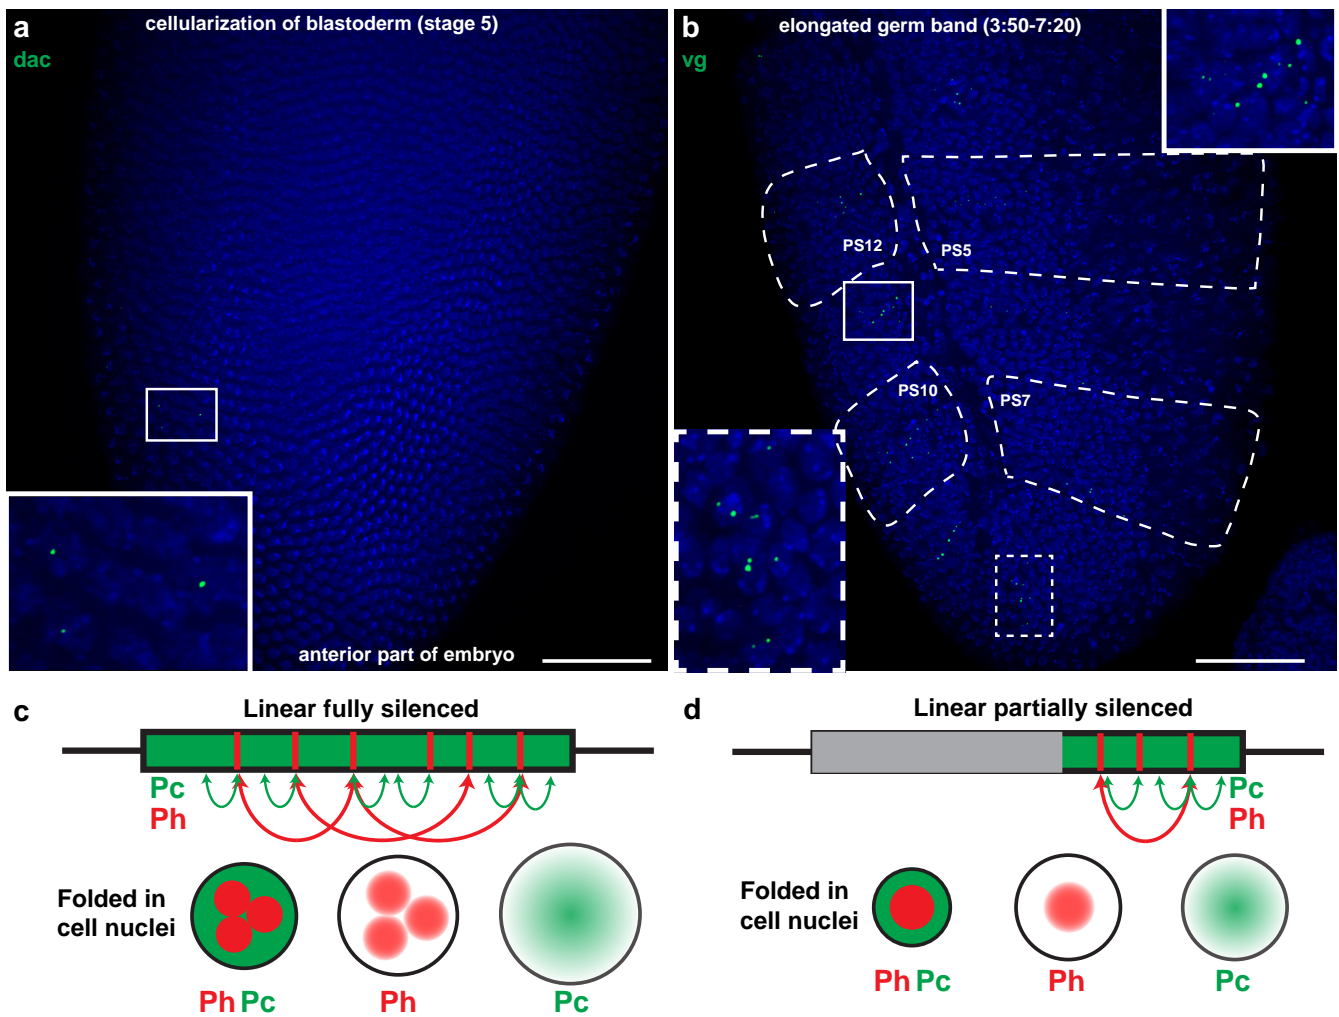

**Supplementary Figure 12: RNA FISH can detect early transcription of *dac* and *vg* and model depicting the effect of *Ph* and *Pc* on Hox clusters folding.** a, b, Images of RNA FISH experiments showing *dac* expression in embryos at developmental stage 5 (a) and *vg* expression in embryos at elongated germ band stage (b). Scale bars, 50  $\mu\text{m}$ . c, d, Model depicting a cautious interpretation of the results. The top part shows a linear representation of totally (c) or partially (d) repressed Hox domains and the bottom part represents schematically their folding inside the cell nucleus. They are composed of discrete sites bound by *Ph* and *Pc* and wide regions containing H3K27me3 where *Pc* can bind. In WT cells, *Ph* binds discrete sites and might generate loops (red arrows) through its ability to oligomerize. On the other hand, *Pc* might further compact repressed chromatin domains by local interactions between discrete sites and regions containing H3K27me3 (green arrows). These two distinct forces would compact large repressed chromatin domains and form PRC1 nuclear foci. In the absence of *Pc*, *Ph* might still produce loops between discrete sites and fold repressed chromatin domains, therefore forming nuclear foci. The compaction effect of *Ph* in the absence of *Pc* would be weaker for partially repressed chromatin domains because fewer loops involving a smaller linear domain would exist. In contrast, no loops might be established in the absence of *Ph*, and the local effect of *Pc* might not be sufficient to form nuclear foci, explaining the stronger effect of *Ph* mutations than that of *Pc* mutations.

## **Supplementary Note 1**

### **Statistical information**

We listed the numbers of measurements made in each figure of this study. The numbers of embryos in which we measured the density of RNA FISH spots are shown in Supplementary Tables 2, 5-7. For DNA FISH experiments, the numbers of distances measured and the numbers of embryos for each condition are listed in Supplementary Tables 3-4, 8-9, 11-12. We listed in Supplementary Tables 10 and 13, the numbers of Pc/Ph foci and the numbers of embryos used to quantify Pc and Ph enrichments.

### **Fig. 1**

RNA FISH: Number (No.) of embryos in Supplementary Table 2

DNA FISH (No. of distances analysed) in Supplementary Table 3-4

### **Fig. 2 and Supplementary Fig. 2**

RNA FISH (No. of embryos) in Supplementary Table 5-7

### **Fig. 3-5**

DNA FISH: BX-C in Supplementary Table 8

DNA FISH: ANT-C in Supplementary Table 9

### **Fig. 5g, h**

Quantification of Pc/Ph enrichments in Supplementary Table 10

### **Supplementary Fig. 8**

DNA FISH in Supplementary Table 11

### **Supplementary Fig. 9-10**

DNA FISH in Supplementary Table 12

### **Supplementary Fig. 11**

Quantification of Pc/Ph enrichments in Supplementary Table 13

**Supplementary Table 1: List of primers used in this study**

| primers name | sens (sequence)                            | anti-sens (sequence)                        | experiments |
|--------------|--------------------------------------------|---------------------------------------------|-------------|
| Ubx          | ggcaatggtgtttctttggt                       | tggctgtgatctcgcttaga                        | RNA FISH    |
| abdA         | gcggatcgcgtaaaataaac                       | tcggatctgaatgtgagtc                         | RNA FISH    |
| AbdB         | catcgcgataaaaaccaca                        | cggaaagttaaagacggcaat                       | RNA FISH    |
| lab          | tgagccataaacacctgtgc                       | ggcaattaagaaccgcatt                         | RNA FISH    |
| pb           | gtcgcgacggacgacatttac                      | ggcgatgtttagcacagaa                         | RNA FISH    |
| Dfd          | tgcaacttgacatggagaa                        | acataaatgacacggacca                         | RNA FISH    |
| Scr          | atcctggtcttgcactgtt                        | acaagcgcgcatatagaag                         | RNA FISH    |
| Antp         | cattcagcggcacatcatta                       | tgatttctctggagcttcg                         | RNA FISH    |
| Ubx + T7     | gtaatacgactcactatagggcggcaatggtgtttctttggt | gtaatacgactcactatagggctggtgtgatctcgcttaga   | RNA FISH    |
| abdA + T7    | gtaatacgactcactatagggcgcggtcgcgtaaaataaac  | gtaatacgactcactatagggctcggatctgaatgtgagtc   | RNA FISH    |
| AbdB + T7    | gtaatacgactcactatagggccatcgcgataaaaaccaca  | gtaatacgactcactatagggccgaaagttaaagacggcaat  | RNA FISH    |
| lab + T7     | gtaatacgactcactatagggctgagccataaacacctgtgc | gtaatacgactcactatagggcggcaattaagaaccgcatt   | RNA FISH    |
| pb + T7      | gtaatacgactcactatagggcgtcgcgacgacgacatttac | gtaatacgactcactatagggcggcatgtttagcacagaa    | RNA FISH    |
| Dfd + T7     | gtaatacgactcactatagggctgcaacttgacatggagaa  | gtaatacgactcactatagggcacataaatgacacggacca   | RNA FISH    |
| Scr + T7     | gtaatacgactcactatagggcatcctgtcttgcactgtt   | gtaatacgactcactatagggcacaagcggcgcataatagaag | RNA FISH    |
| Antp + T7    | gtaatacgactcactatagggcattcagcggcacatcatta  | gtaatacgactcactatagggctgatttctctggagcttcg   | RNA FISH    |
| Antp         | cgaatccgaaaaatctgga                        | gcagaaatcaccggccatt                         | DNA FISH    |
|              | ggaccgatgaaatcgataa                        | ggcagccatttctctcag                          | DNA FISH    |
|              | tatacctgcccactgcaca                        | cacaacaaagcactcgaggga                       | DNA FISH    |
|              | cgtgagctgcaactgtag                         | gagagcgagagcgtaggaga                        | DNA FISH    |
|              | ggtacactcccctcagcaa                        | tgccgtacaacaccactgt                         | DNA FISH    |
|              | ccgaaaatcgtaggagga                         | tgacggcattatcaaca                           | DNA FISH    |
| Scr          | atcagcgtcttgctgactt                        | tgatgacgatgacggagtgt                        | DNA FISH    |
|              | aatttcagcttgcgtgctt                        | ttaagcgtttggaacaggt                         | DNA FISH    |
|              | tggctagactttgcgtcct                        | cactgtgtgtgaggattg                          | DNA FISH    |
|              | ccaggtcaatcagctttg                         | ggccaacataaagagctga                         | DNA FISH    |
|              | aaaggagcagtaaggcagca                       | acacgcatagtgtgggtgaa                        | DNA FISH    |
|              | gggaaagacggattgcagta                       | agccattgacccaattcag                         | DNA FISH    |
| lab          | gcattctggtgtcacttt                         | ctcccattgcatgaagatt                         | DNA FISH    |
|              | cgtctcccagatccagtat                        | gcctgtgcagagtcagtcag                        | DNA FISH    |
|              | tctacaactcgcgtcattc                        | ctatccgattcgcactct                          | DNA FISH    |
|              | ctgcaaatgctgatctgtt                        | ttccaatccatagcaagc                          | DNA FISH    |
|              | agaggcgacaagcctctaca                       | tgttgcagtgaagcgcact                         | DNA FISH    |
|              | taaagccaaccggcattaag                       | gcgcagctctgactgtgta                         | DNA FISH    |
| Ubx          | gaccgccaagggtcttatta                       | tcggcgaattgattactcc                         | DNA FISH    |
|              | cgcaaggctctcgaatttag                       | gaaaagcagcgagacagacc                        | DNA FISH    |
|              | cccgtgtccaatgtcttt                         | taggccgagtcgagtgatt                         | DNA FISH    |
|              | cccgtatttctcgggttta                        | ccaacttctgcagggagag                         | DNA FISH    |
|              | tcatcggtagctgttcag                         | tggtccatttcttactca                          | DNA FISH    |
|              | acattgcgacatgtcaagc                        | gtttgtcctggcattgta                          | DNA FISH    |
| abdA         | ttgacaccaaatctgttca                        | cctggatgacgcttacaggt                        | DNA FISH    |
|              | attgttggtgatccctgtc                        | ccacagttccagccgtttat                        | DNA FISH    |
|              | gaattcagcgtggagaggag                       | gcggcaatacattcagttt                         | DNA FISH    |
|              | ttgctctatcctctctgt                         | tggcgttttatttttcc                           | DNA FISH    |
|              | tcccaggataagtgtcag                         | acacacacagcagacaagc                         | DNA FISH    |
|              | caagtgtgtgtgggacag                         | gctgcatttggatgacatgg                        | DNA FISH    |
| AbdB         | aagatgagcagcgaacact                        | cagaccgagaaaacgagagg                        | DNA FISH    |
|              | aagggtgcagtgtgaaag                         | atcacgtacggcctaaagc                         | DNA FISH    |
|              | aaactctttacggcgaca                         | caggaaaccgaaatgaaag                         | DNA FISH    |
|              | gctgccagataaaggacgac                       | gcaaatcgggctaaatgtgt                        | DNA FISH    |
|              | ggtcctaatccggtgctgtgt                      | aatcggaaaccggaaactct                        | DNA FISH    |
|              | ttgattcccggactctgac                        | acctgctccaagaaaaatg                         | DNA FISH    |



**Supplementary Table 2: Number of embryos analysed in Figure 1c**

|           | Wi1118 | Head | PS0 | PS1 | PS2 | PS3 | PS4 | PS5 | PS6 | PS7 | PS8 | PS9 | PS10 | PS11 | PS12 | PS13 | PS14 |
|-----------|--------|------|-----|-----|-----|-----|-----|-----|-----|-----|-----|-----|------|------|------|------|------|
| 3:50-7:20 | lab    | 25   | 25  | 25  | 25  | 25  | 25  | 25  | 25  | 25  | 25  | 19  | 19   | 19   | 19   | 19   | 19   |
|           | pb     | 24   | 24  | 24  | 24  | 24  | 24  | 24  | 24  | 24  | 24  | 18  | 18   | 18   | 18   | 18   | 18   |
|           | Dfd    | 47   | 47  | 47  | 47  | 47  | 47  | 47  | 47  | 47  | 45  | 38  | 37   | 37   | 37   | 37   | 37   |
|           | Scr    | 32   | 32  | 32  | 32  | 32  | 32  | 32  | 32  | 32  | 30  | 29  | 28   | 28   | 28   | 28   | 28   |
|           | Antp   | 43   | 43  | 43  | 43  | 43  | 43  | 43  | 43  | 43  | 41  | 40  | 39   | 39   | 39   | 39   | 39   |
|           | Ubx    | 28   | 24  | 24  | 24  | 24  | 24  | 24  | 24  | 24  | 25  | 23  | 23   | 23   | 23   | 23   | 23   |
|           | abdA   | 28   | 24  | 24  | 24  | 24  | 24  | 24  | 24  | 24  | 25  | 23  | 23   | 23   | 23   | 23   | 23   |
|           | AbdB   | 28   | 24  | 24  | 24  | 24  | 24  | 24  | 24  | 24  | 25  | 23  | 23   | 23   | 23   | 23   | 23   |

**Supplementary Table 3: Number of distances measured in Figure 1d, h**

|                | Head | PS0  | PS1  | PS2  | PS3  | PS4  | PS5  | PS6  | PS7  | PS8  | PS9  | PS10 | PS11 | PS12 | PS13 | PS14 |
|----------------|------|------|------|------|------|------|------|------|------|------|------|------|------|------|------|------|
| Ubx-AbdB       | 7386 | 5168 | 4604 | 4776 | 5890 | 5221 | 4091 | 3522 | 3700 | 2842 | 3056 | 2909 | 3230 | 3465 | 3507 | 4053 |
| abdA-AbdB      | 7386 | 5161 | 4602 | 4757 | 5902 | 5234 | 4103 | 3526 | 3730 | 2838 | 3004 | 2867 | 3182 | 3330 | 3498 | 4065 |
| Ubx-abdA       | 7426 | 5169 | 4646 | 4805 | 5930 | 5253 | 4124 | 3548 | 3686 | 2838 | 3004 | 2862 | 3180 | 3367 | 3503 | 4032 |
| Ubx-Pc         | 3713 | 2588 | 2324 | 2412 | 2959 | 2620 | 2056 | 1772 | 1828 | 1421 | 1528 | 1452 | 1614 | 1751 | 1756 | 2010 |
| abdA-Pc        | 3713 | 2581 | 2322 | 2393 | 2971 | 2633 | 2068 | 1776 | 1858 | 1417 | 1476 | 1410 | 1566 | 1616 | 1747 | 2022 |
| AbdB-Pc        | 3673 | 2580 | 2280 | 2364 | 2931 | 2601 | 2035 | 1750 | 1872 | 1421 | 1528 | 1457 | 1616 | 1714 | 1751 | 2043 |
| No. of embryos | 19   | 19   | 18   | 18   | 18   | 18   | 18   | 18   | 18   | 17   | 16   | 16   | 16   | 16   | 16   | 16   |

**Supplementary Table 4: Number of distances measured in Figure 1e, i**

|                | Head  | PS0  | PS1  | PS2  | PS3  | PS4  | PS5  | PS6  | PS7  | PS8  | PS9  | PS10 | PS11 | PS12 | PS13 | PS14 |
|----------------|-------|------|------|------|------|------|------|------|------|------|------|------|------|------|------|------|
| lab-Antp       | 12311 | 4014 | 5330 | 4481 | 6620 | 5800 | 5136 | 4395 | 5547 | 4214 | 4425 | 5394 | 5713 | 5415 | 5659 | 5295 |
| Scr-Antp       | 12335 | 4005 | 5282 | 4440 | 6607 | 5783 | 5105 | 4365 | 5500 | 4226 | 4413 | 5365 | 5695 | 5396 | 5663 | 5299 |
| lab-Scr        | 12492 | 4071 | 5408 | 4579 | 6701 | 5961 | 5257 | 4482 | 5643 | 4314 | 4484 | 5455 | 5796 | 5497 | 5746 | 5402 |
| lab-Pc         | 6234  | 2040 | 2728 | 2310 | 3357 | 2989 | 2644 | 2256 | 2845 | 2151 | 2248 | 2742 | 2907 | 2758 | 2871 | 2699 |
| Scr-Pc         | 6258  | 2031 | 2680 | 2269 | 3344 | 2972 | 2613 | 2226 | 2798 | 2163 | 2236 | 2713 | 2889 | 2739 | 2875 | 2703 |
| Antp-Pc        | 6077  | 1974 | 2602 | 2171 | 3263 | 2811 | 2492 | 2139 | 2702 | 2063 | 2177 | 2652 | 2806 | 2657 | 2788 | 2596 |
| No. of embryos | 19    | 19   | 17   | 17   | 17   | 17   | 17   | 17   | 17   | 17   | 15   | 16   | 16   | 16   | 16   | 16   |



**Supplementary Table 6: Number of Ph<sup>del</sup> embryos analysed in Figure 2 and Supplementary Figure 2**

|            | Ph del | Head | PS0 | PS1 | PS2 | PS3 | PS4 | PS5 | PS6 | PS7 | PS8 | PS9 | PS10 | PS11 | PS12 | PS13 | PS14 |
|------------|--------|------|-----|-----|-----|-----|-----|-----|-----|-----|-----|-----|------|------|------|------|------|
| 3:50-4:50  | lab    | 5    | 5   | 5   | 5   | 5   | 5   | 5   | 5   | 5   | 5   | 5   | 5    | 5    | 5    | 5    | 5    |
|            | pb     | 5    | 5   | 5   | 5   | 5   | 5   | 5   | 5   | 5   | 5   | 5   | 5    | 5    | 5    | 5    | 5    |
|            | Dfd    | 6    | 6   | 6   | 6   | 6   | 6   | 6   | 6   | 6   | 6   | 6   | 6    | 6    | 6    | 6    | 6    |
|            | Scr    | 7    | 7   | 7   | 7   | 7   | 7   | 7   | 7   | 7   | 7   | 7   | 7    | 7    | 7    | 7    | 7    |
|            | Antp   | 11   | 11  | 11  | 11  | 11  | 11  | 11  | 11  | 11  | 11  | 11  | 11   | 11   | 11   | 11   | 11   |
|            | Ubx    | 5    | 5   | 5   | 5   | 5   | 5   | 5   | 5   | 5   | 5   | 5   | 5    | 5    | 5    | 5    | 4    |
|            | abdA   | 5    | 5   | 5   | 5   | 5   | 5   | 5   | 5   | 5   | 5   | 5   | 5    | 5    | 5    | 5    | 4    |
|            | AbdB   | 5    | 5   | 5   | 5   | 5   | 5   | 5   | 5   | 5   | 5   | 5   | 5    | 5    | 5    | 5    | 4    |
| 4:50-6:00  | lab    | 7    | 8   | 8   | 8   | 8   | 8   | 8   | 8   | 8   | 8   | 7   | 7    | 7    | 7    | 7    | 7    |
|            | pb     | 9    | 9   | 9   | 9   | 9   | 9   | 9   | 9   | 9   | 9   | 8   | 8    | 8    | 8    | 8    | 8    |
|            | Dfd    | 13   | 14  | 14  | 14  | 14  | 14  | 14  | 14  | 14  | 13  | 10  | 10   | 10   | 10   | 10   | 10   |
|            | Scr    | 14   | 14  | 14  | 14  | 14  | 14  | 14  | 14  | 14  | 13  | 9   | 9    | 9    | 9    | 9    | 9    |
|            | Antp   | 22   | 23  | 23  | 23  | 23  | 23  | 23  | 23  | 23  | 22  | 17  | 17   | 17   | 17   | 17   | 17   |
|            | Ubx    | 16   | 15  | 15  | 15  | 15  | 15  | 15  | 15  | 15  | 12  | 9   | 10   | 10   | 10   | 10   | 10   |
|            | abdA   | 16   | 15  | 15  | 15  | 15  | 15  | 15  | 15  | 15  | 12  | 9   | 10   | 10   | 10   | 10   | 10   |
|            | AbdB   | 16   | 15  | 15  | 15  | 15  | 15  | 15  | 15  | 15  | 12  | 9   | 10   | 10   | 10   | 10   | 10   |
| 6:00-7:20  | lab    | 6    | 6   | 6   | 6   | 6   | 6   | 6   | 6   | 6   | 6   | 6   | 6    | 6    | 6    | 6    | 6    |
|            | pb     | 8    | 10  | 10  | 10  | 10  | 10  | 10  | 10  | 10  | 10  | 10  | 10   | 10   | 10   | 10   | 10   |
|            | Dfd    | 8    | 8   | 8   | 8   | 8   | 8   | 8   | 8   | 8   | 7   | 7   | 7    | 7    | 7    | 7    | 7    |
|            | Scr    | 10   | 12  | 12  | 12  | 12  | 12  | 12  | 12  | 12  | 11  | 11  | 11   | 11   | 11   | 11   | 11   |
|            | Antp   | 16   | 18  | 18  | 18  | 18  | 18  | 18  | 18  | 18  | 17  | 17  | 17   | 17   | 17   | 17   | 17   |
|            | Ubx    | 9    | 7   | 7   | 7   | 7   | 7   | 7   | 7   | 7   | 7   | 7   | 8    | 8    | 8    | 8    | 8    |
|            | abdA   | 9    | 7   | 7   | 7   | 7   | 7   | 7   | 7   | 7   | 7   | 7   | 8    | 8    | 8    | 8    | 8    |
|            | AbdB   | 9    | 7   | 7   | 7   | 7   | 7   | 7   | 7   | 7   | 7   | 7   | 8    | 8    | 8    | 8    | 8    |
| 7:20-12:00 | lab    | 10   | 13  | 14  | 14  | 14  | 14  | 14  | 14  | 14  | 14  | 14  | 14   | 14   | 14   | 14   | 12   |
|            | pb     | 10   | 13  | 14  | 14  | 14  | 14  | 14  | 14  | 14  | 14  | 14  | 14   | 14   | 14   | 14   | 12   |
|            | Dfd    | 12   | 12  | 12  | 12  | 12  | 12  | 12  | 12  | 12  | 12  | 12  | 12   | 12   | 12   | 11   | 9    |
|            | Scr    | 12   | 12  | 12  | 12  | 12  | 12  | 12  | 12  | 12  | 12  | 12  | 12   | 12   | 12   | 11   | 9    |
|            | Antp   | 22   | 25  | 26  | 26  | 26  | 26  | 26  | 26  | 26  | 26  | 26  | 26   | 26   | 26   | 25   | 21   |
|            | Ubx    | 18   | 12  | 15  | 17  | 18  | 18  | 18  | 18  | 18  | 18  | 17  | 17   | 17   | 16   | 15   | 13   |
|            | abdA   | 18   | 12  | 15  | 17  | 18  | 18  | 18  | 18  | 18  | 18  | 17  | 17   | 17   | 16   | 15   | 13   |
|            | AbdB   | 18   | 12  | 15  | 17  | 18  | 18  | 18  | 18  | 18  | 18  | 17  | 17   | 17   | 16   | 15   | 13   |



**Supplementary Table 8: Number of distances (BX-C) measured in Figure 3-5**

|            |                  |           | Head_PS0 |         | PS2-PS4  |         | PS9-PS12 |         | PS14     |         |
|------------|------------------|-----------|----------|---------|----------|---------|----------|---------|----------|---------|
|            |                  |           | No. dist | No. emb | No. dist | No. emb | No. dist | No. emb | No. dist | No. emb |
| 3:50-4:50  | Control_Ph del   | Ubx-AbdB  | 7760     | 14      | 6622     | 10      | 3642     | 7       | 1475     | 6       |
|            |                  | abdA-AbdB | 7737     |         | 6578     |         | 3631     |         | 1480     |         |
|            |                  | Ubx-abdA  | 7795     |         | 6716     |         | 3551     |         | 1461     |         |
|            | Ph del           | Ubx-AbdB  | 6999     | 13      | 5697     | 9       | 5001     | 8       | 1705     | 6       |
|            |                  | abdA-AbdB | 6986     |         | 5712     |         | 4881     |         | 1738     |         |
|            |                  | Ubx-abdA  | 7043     |         | 5712     |         | 4881     |         | 1697     |         |
|            | Control_Pc xt109 | Ubx-AbdB  | 5215     | 10      | 4507     | 6       | 5461     | 7       | 1836     | 6       |
|            |                  | abdA-AbdB | 5122     |         | 4437     |         | 5279     |         | 1793     |         |
|            |                  | Ubx-abdA  | 5311     |         | 4592     |         | 5494     |         | 1967     |         |
|            | Pc xt109         | Ubx-AbdB  | 9036     | 13      | 9690     | 11      | 3513     | 5       | 1645     | 5       |
|            |                  | abdA-AbdB | 8876     |         | 9409     |         | 3537     |         | 1641     |         |
|            |                  | Ubx-abdA  | 9002     |         | 9505     |         | 3542     |         | 1688     |         |
| 4:50-6:00  | Control_Ph del   | Ubx-AbdB  | 8644     | 11      | 7089     | 6       | 6373     | 8       | 2181     | 8       |
|            |                  | abdA-AbdB | 8603     |         | 7036     |         | 6408     |         | 2165     |         |
|            |                  | Ubx-abdA  | 8599     |         | 7043     |         | 6085     |         | 2148     |         |
|            | Ph del           | Ubx-AbdB  | 8422     | 14      | 7936     | 10      | 8762     | 9       | 3622     | 7       |
|            |                  | abdA-AbdB | 8479     |         | 8148     |         | 8595     |         | 3617     |         |
|            |                  | Ubx-abdA  | 8667     |         | 8134     |         | 8721     |         | 3683     |         |
|            | Control_Pc xt109 | Ubx-AbdB  | 5483     | 9       | 4947     | 6       | 4693     | 5       | 1505     | 5       |
|            |                  | abdA-AbdB | 5400     |         | 4806     |         | 4604     |         | 1523     |         |
|            |                  | Ubx-abdA  | 5433     |         | 4877     |         | 4833     |         | 1596     |         |
|            | Pc xt109         | Ubx-AbdB  | 7376     | 11      | 9236     | 8       | 6585     | 7       | 2335     | 5       |
|            |                  | abdA-AbdB | 7389     |         | 9297     |         | 6506     |         | 2331     |         |
|            |                  | Ubx-abdA  | 7589     |         | 9585     |         | 6621     |         | 2390     |         |
| 6:00-7:20  | Control_Ph del   | Ubx-AbdB  | 6268     | 10      | 9521     | 8       | 3626     | 5       | 842      | 4       |
|            |                  | abdA-AbdB | 6239     |         | 9556     |         | 3519     |         | 829      |         |
|            |                  | Ubx-abdA  | 6311     |         | 9645     |         | 3543     |         | 849      |         |
|            | Ph del           | Ubx-AbdB  | 8489     | 15      | 10459    | 8       | 9474     | 9       | 4229     | 7       |
|            |                  | abdA-AbdB | 8637     |         | 10704    |         | 9748     |         | 4419     |         |
|            |                  | Ubx-abdA  | 8720     |         | 10927    |         | 9662     |         | 4390     |         |
|            | Control_Pc xt109 | Ubx-AbdB  | 4338     | 11      | 6941     | 8       | 6344     | 9       | 2269     | 6       |
|            |                  | abdA-AbdB | 4337     |         | 7212     |         | 6272     |         | 2205     |         |
|            |                  | Ubx-abdA  | 4553     |         | 7503     |         | 6554     |         | 2334     |         |
|            | Pc xt109         | Ubx-AbdB  | 6980     | 12      | 6366     | 8       | 13503    | 10      | 5051     | 10      |
|            |                  | abdA-AbdB | 6986     |         | 6336     |         | 13362    |         | 5130     |         |
|            |                  | Ubx-abdA  | 7064     |         | 6400     |         | 13602    |         | 5163     |         |
| 7:20-12:00 | Control_Ph del   | Ubx-AbdB  | 7942     | 12      | 10980    | 12      | 9242     | 11      | 1293     | 9       |
|            |                  | abdA-AbdB | 7799     |         | 10942    |         | 8979     |         | 1259     |         |
|            |                  | Ubx-abdA  | 7825     |         | 10990    |         | 8779     |         | 1308     |         |
|            | Ph del           | Ubx-AbdB  | 4535     | 13      | 7205     | 12      | 9776     | 13      | 515      | 6       |
|            |                  | abdA-AbdB | 4498     |         | 7332     |         | 10088    |         | 539      |         |
|            |                  | Ubx-abdA  | 4703     |         | 7545     |         | 10308    |         | 576      |         |
|            | Control_Pc xt109 | Ubx-AbdB  | 6788     | 11      | 7328     | 11      | 7856     | 11      | 1243     | 7       |
|            |                  | abdA-AbdB | 6641     |         | 7177     |         | 7627     |         | 1204     |         |
|            |                  | Ubx-abdA  | 6851     |         | 7479     |         | 7823     |         | 1241     |         |
|            | Pc xt109         | Ubx-AbdB  | 8081     | 17      | 9922     | 17      | 13259    | 17      | 1993     | 13      |
|            |                  | abdA-AbdB | 8032     |         | 9910     |         | 13047    |         | 1983     |         |
|            |                  | Ubx-abdA  | 8259     |         | 10150    |         | 13462    |         | 2042     |         |

**Supplementary Table 9: Number of distances (ANT-C) measured in Figure 3-5**

|            |                  |          | Head     |         | PS4-PS5  |         |
|------------|------------------|----------|----------|---------|----------|---------|
|            |                  |          | No. dist | No. emb | No. dist | No. emb |
| 3:50-4:50  | Control_Ph del   | lab-Antp | 4162     | 12      | 3431     | 9       |
|            |                  | Scr-Antp | 4172     |         | 3457     |         |
|            |                  | lab-Scr  | 4172     |         | 3560     |         |
|            | Ph del           | lab-Antp | 4198     | 13      | 3289     | 8       |
|            |                  | Scr-Antp | 4174     |         | 3322     |         |
|            |                  | lab-Scr  | 4182     |         | 3523     |         |
|            | Control_Pc xt109 | lab-Antp | 3410     | 10      | 3551     | 8       |
|            |                  | Scr-Antp | 3392     |         | 3520     |         |
|            |                  | lab-Scr  | 3344     |         | 3541     |         |
|            | Pc xt109         | lab-Antp | 4988     | 13      | 6939     | 10      |
|            |                  | Scr-Antp | 5043     |         | 7089     |         |
|            |                  | lab-Scr  | 5165     |         | 7386     |         |
| 4:50-6:00  | Control_Ph del   | lab-Antp | 4410     | 11      | 3527     | 6       |
|            |                  | Scr-Antp | 4362     |         | 3436     |         |
|            |                  | lab-Scr  | 4298     |         | 3421     |         |
|            | Ph del           | lab-Antp | 3957     | 12      | 5527     | 8       |
|            |                  | Scr-Antp | 4006     |         | 5405     |         |
|            |                  | lab-Scr  | 3863     |         | 5492     |         |
|            | Control_Pc xt109 | lab-Antp | 2513     | 6       | 3094     | 4       |
|            |                  | Scr-Antp | 2569     |         | 3288     |         |
|            |                  | lab-Scr  | 2562     |         | 3326     |         |
|            | Pc xt109         | lab-Antp | 5093     | 12      | 4918     | 9       |
|            |                  | Scr-Antp | 4989     |         | 4781     |         |
|            |                  | lab-Scr  | 4996     |         | 4891     |         |
| 6:00-7:20  | Control_Ph del   | lab-Antp | 2680     | 7       | 3126     | 4       |
|            |                  | Scr-Antp | 2614     |         | 3090     |         |
|            |                  | lab-Scr  | 2654     |         | 3176     |         |
|            | Ph del           | lab-Antp | 4524     | 12      | 6795     | 8       |
|            |                  | Scr-Antp | 4522     |         | 6927     |         |
|            |                  | lab-Scr  | 4464     |         | 6974     |         |
|            | Control_Pc xt109 | lab-Antp | 3460     | 8       | 4184     | 6       |
|            |                  | Scr-Antp | 3407     |         | 4188     |         |
|            |                  | lab-Scr  | 3493     |         | 4252     |         |
|            | Pc xt109         | lab-Antp | 3577     | 8       | 4646     | 6       |
|            |                  | Scr-Antp | 3641     |         | 4678     |         |
|            |                  | lab-Scr  | 3438     |         | 4520     |         |
| 7:20-12:00 | Control_Ph del   | lab-Antp | 5609     | 14      | 6855     | 14      |
|            |                  | Scr-Antp | 5603     |         | 6846     |         |
|            |                  | lab-Scr  | 5732     |         | 7117     |         |
|            | Ph del           | lab-Antp | 7274     | 15      | 7246     | 16      |
|            |                  | Scr-Antp | 7340     |         | 7214     |         |
|            |                  | lab-Scr  | 7527     |         | 7434     |         |
|            | Control_Pc xt109 | lab-Antp | 4041     | 12      | 7032     | 13      |
|            |                  | Scr-Antp | 4069     |         | 6953     |         |
|            |                  | lab-Scr  | 3980     |         | 7011     |         |
|            | Pc xt109         | lab-Antp | 4263     | 14      | 8995     | 15      |
|            |                  | Scr-Antp | 4149     |         | 8621     |         |
|            |                  | lab-Scr  | 4134     |         | 8759     |         |

**Supplementary Table 10: Number of foci analysed in Figure 5g, h**

|          | Pc          |     |        |     |             |          |          |          | Ph            |     |          |     |               |          |          |          |
|----------|-------------|-----|--------|-----|-------------|----------|----------|----------|---------------|-----|----------|-----|---------------|----------|----------|----------|
|          | Scr         |     |        |     | abdA        |          |          |          | Scr           |     |          |     | abdA          |          |          |          |
|          | cont Ph del |     | Ph del |     | cont Ph del |          | Ph del   |          | cont Pc xt109 |     | Pc xt109 |     | cont Pc xt109 |          | Pc xt109 |          |
|          | Head        | PS2 | Head   | PS2 | Head-PS0    | PS9-PS12 | Head-PS0 | PS9-PS12 | Head          | PS2 | Head     | PS2 | Head-PS0      | PS9-PS12 | Head-PS0 | PS9-PS12 |
| No. emb  | 6           | 6   | 7      | 7   | 7           | 6        | 7        | 7        | 8             | 8   | 9        | 9   | 9             | 9        | 10       | 10       |
| No. foci | 782         | 348 | 773    | 256 | 873         | 600      | 571      | 602      | 715           | 533 | 743      | 504 | 872           | 724      | 649      | 624      |

**Supplementary Table 11: Number of distances measured in Supplementary Figure 8**

|            |           | Ubx-AbdB | abdA-AbdB | Ubx-abdA | lab-Antp | Scr-Antp | lab-Scr |      |
|------------|-----------|----------|-----------|----------|----------|----------|---------|------|
| 3:50-4:50  | repressed | No. dist | 12975     | 12859    | 13106    | 7572     | 7564    | 7516 |
|            |           | No. emb  | 24        |          |          | 22       |         |      |
|            | Ph del    | No. dist | 6999      | 6986     | 7043     | 4198     | 4174    | 4182 |
|            |           | No. emb  | 13        |          |          | 13       |         |      |
|            | Pc xt109  | No. dist | 9036      | 8876     | 9002     | 4988     | 5043    | 5165 |
|            |           | No. emb  | 13        |          |          | 13       |         |      |
|            | expressed | No. dist | 8698      | 3273     | 8932     | 6982     | 6977    | 8327 |
|            |           | No. emb  | 16        | 12       | 16       | 17       | 17      | 17   |
| 7:20-12:00 | repressed | No. dist | 14730     | 14440    | 14676    | 9650     | 9672    | 9712 |
|            |           | No. emb  | 23        |          |          | 26       |         |      |
|            | Ph del    | No. dist | 4535      | 4498     | 4703     | 7274     | 7341    | 7527 |
|            |           | No. emb  | 13        |          |          | 15       |         |      |
|            | Pc xt109  | No. dist | 8081      | 8032     | 8259     | 4263     | 4149    | 4134 |
|            |           | No. emb  | 17        |          |          | 14       |         |      |
|            | expressed | No. dist | 13095     | 2463     | 12813    | 13887    | 13799   | 6954 |
|            |           | No. emb  | 22        | 23       | 22       | 27       | 27      | 26   |

**Supplementary Table 12: Number of embryos analysed in Supplementary Figure 9-10**

|                  |       | Head | PS0 | PS1 | PS2 | PS3 | PS4 | PS5 | PS6 | PS7 | PS8 | PS9 | PS10 | PS11 | PS12 | PS13 | PS14 |
|------------------|-------|------|-----|-----|-----|-----|-----|-----|-----|-----|-----|-----|------|------|------|------|------|
| Control_Ph del   | BX-C  | 25   | 24  | 20  | 16  | 16  | 16  | 14  | 14  | 14  | 14  | 14  | 15   | 15   | 15   | 15   | 14   |
|                  | ANT-C | 23   | 18  | 15  | 15  | 15  | 15  | 15  | 14  | 15  | 14  | 9   | 9    | 9    | 9    | 9    | 9    |
| Ph del           | BX-C  | 27   | 24  | 19  | 17  | 16  | 17  | 17  | 17  | 16  | 17  | 17  | 17   | 16   | 15   | 15   | 13   |
|                  | ANT-C | 25   | 15  | 16  | 16  | 16  | 16  | 15  | 15  | 15  | 14  | 10  | 10   | 10   | 10   | 10   | 10   |
| Control_Pc xt109 | BX-C  | 18   | 13  | 11  | 11  | 11  | 11  | 11  | 10  | 10  | 10  | 11  | 11   | 11   | 12   | 12   | 11   |
|                  | ANT-C | 16   | 12  | 12  | 12  | 12  | 12  | 12  | 12  | 12  | 12  | 8   | 8    | 8    | 8    | 8    | 8    |
| Pc xt109         | BX-C  | 24   | 22  | 21  | 19  | 19  | 18  | 18  | 18  | 18  | 17  | 10  | 9    | 10   | 11   | 10   | 10   |
|                  | ANT-C | 25   | 20  | 19  | 19  | 19  | 19  | 19  | 18  | 18  | 17  | 8   | 8    | 8    | 8    | 8    | 8    |
| Control_Ph del   | BX-C  | 12   | 8   | 12  | 11  | 12  | 12  | 11  | 11  | 11  | 11  | 11  | 11   | 10   | 10   | 10   | 9    |
|                  | ANT-C | 14   | 7   | 14  | 9   | 14  | 14  | 13  | 13  | 13  | 14  | 14  | 12   | 11   | 11   | 11   | 6    |
| Ph del           | BX-C  | 13   | 8   | 12  | 7   | 12  | 11  | 11  | 11  | 11  | 11  | 12  | 12   | 12   | 12   | 10   | 6    |
|                  | ANT-C | 15   | 8   | 13  | 11  | 16  | 16  | 16  | 16  | 15  | 15  | 15  | 15   | 16   | 16   | 16   | 13   |
| Control_Pc xt109 | BX-C  | 11   | 9   | 11  | 11  | 11  | 11  | 11  | 11  | 11  | 11  | 11  | 10   | 10   | 11   | 11   | 7    |
|                  | ANT-C | 12   | 5   | 8   | 9   | 13  | 13  | 13  | 13  | 13  | 13  | 13  | 13   | 13   | 13   | 11   | 10   |
| Pc xt109         | BX-C  | 17   | 8   | 14  | 13  | 17  | 17  | 16  | 17  | 16  | 16  | 16  | 17   | 17   | 15   | 15   | 13   |
|                  | ANT-C | 14   | 6   | 13  | 15  | 15  | 15  | 15  | 15  | 15  | 15  | 15  | 15   | 15   | 15   | 13   | 11   |

**Supplementary Table 13: Number of foci analysed in Supplementary Figure 11**

|                | Pc          |        | Ph            |          |
|----------------|-------------|--------|---------------|----------|
|                | cont Ph del | Ph del | cont Pc xt109 | Pc xt109 |
| No. of embryos | 7           | 7      | 9             | 11       |
| No. of foci    | 2170        | 1755   | 1755          | 1978     |
